# Supplementary material for: Antibacterial and Cytotoxic New Napyradiomycins from the Marine-Derived Streptomyces sp. SCSIO 10428
Source: MDPI journal article supplement (doi:10.3390/md11062113), 2013-06-14
Supplement: s1 [file s1]

# Supporting Information

## Table of Content

|                                                                                                              |       |
|--------------------------------------------------------------------------------------------------------------|-------|
| Elucidation of known compounds <b>4–9</b>                                                                    | 2–3   |
| <b>Table S1.</b> NMR data of napyradiomycin A1 ( <b>4</b> )                                                  | 4     |
| <b>Figure S1.</b> Phylogenetic dendrogram of the strain <i>Streptomyces</i> sp. SCSIO 10428                  | 5     |
| <b>Figure S2.</b> Spectral data for compound <b>1</b>                                                        | 6–11  |
| (A) HRESIMS, IR, and UV spectra of compound <b>1</b>                                                         | 6     |
| (B) The $^1\text{H}$ NMR spectrum of compound <b>1</b> measured in $\text{CDCl}_3$                           | 7     |
| (C) The $^{13}\text{C}$ and the DEPT 135 NMR spectra of compound <b>1</b> measured in $\text{CDCl}_3$        | 8     |
| (D) The HSQC spectrum of compound <b>1</b> measured in $\text{CDCl}_3$                                       | 9     |
| (E) The HMBC spectrum of compound <b>1</b> measured in $\text{CDCl}_3$                                       | 10    |
| (F) The COSY spectrum of compound <b>1</b> measured in $\text{CDCl}_3$                                       | 11    |
| <b>Figure S3.</b> Spectral data for compound <b>2</b>                                                        | 12–17 |
| (A) HRESIMS, IR, and UV spectra of compound <b>2</b>                                                         | 12    |
| (B) The $^1\text{H}$ NMR spectrum of compound <b>2</b> measured in $\text{CDCl}_3$                           | 13    |
| (C) The $^{13}\text{C}$ and the DEPT 135 NMR spectra of compound <b>2</b> measured in $\text{CDCl}_3$        | 14    |
| (D) The HSQC spectrum of compound <b>2</b> measured in $\text{CDCl}_3$                                       | 15    |
| (E) The HMBC spectrum of compound <b>2</b> measured in $\text{CDCl}_3$                                       | 16    |
| (F) The COSY spectrum of compound <b>2</b> measured in $\text{CDCl}_3$                                       | 17    |
| <b>Figure S4.</b> Spectral data for compound <b>3</b> . (NMR measured in $\text{CD}_3\text{OD}$ )            | 18–23 |
| (A) HRESIMS, IR, and UV spectra of compound <b>3</b>                                                         | 18    |
| (B) The $^1\text{H}$ NMR spectrum of compound <b>3</b> measured in $\text{CD}_3\text{OD}$                    | 19    |
| (C) The $^{13}\text{C}$ and the DEPT 135 NMR spectra of compound <b>3</b> measured in $\text{CD}_3\text{OD}$ | 20    |
| (D) The HSQC spectrum of compound <b>3</b> measured in $\text{CD}_3\text{OD}$                                | 21    |
| (E) The HMBC spectrum of compound <b>3</b> measured in $\text{CD}_3\text{OD}$                                | 22    |
| (F) The COSY spectrum of compound <b>3</b> measured in $\text{CD}_3\text{OD}$                                | 23    |
| <b>Figure S5.</b> Spectral data for compound <b>3</b> . (NMR measured in $\text{CDCl}_3$ )                   | 24–26 |
| (A) The $^1\text{H}$ NMR spectrum of compound <b>3</b> measured in $\text{CDCl}_3$                           | 24    |
| (B) The $^{13}\text{C}$ and the DEPT 135 NMR spectra of compound <b>3</b> measured in $\text{CDCl}_3$        | 25    |
| (C) The HMBC spectrum of compound <b>3</b> measured in $\text{CDCl}_3$                                       | 26    |

## Elucidation of Known Compounds 4–9

Compound **4** was obtained as pale yellow oils. The UV absorption pattern was observed at 253, 298 and 364 nm. Its sodium D line rotation was  $[\alpha]_D^{20} +51^\circ$  ( $c$  0.30, MeOH). The molecular formula was determined as  $C_{25}H_{30}Cl_2O_5$  by HRESIMS ( $m/z$  481.1555  $[M + H]^+$ , calcd 481.1549). The IR spectrum of **4** showed broad absorptions for multiple hydroxyl groups band around  $3367\text{ cm}^{-1}$ , and also  $1689\text{ cm}^{-1}$  characteristic for the conjugated carbonyl groups functionality. The 1D and 2D NMR data of **4** was shown in Table S1. Comparing these spectroscopic data with the literature [1,2], we found that **4** was almost identical to napyradiomycin A1. Thus **4** was identified as napyradiomycin A1.

Compound **5** was obtained as pale yellow oils. The molecular formula was determined as  $C_{25}H_{28}Cl_2O_6$  by HRESIMS ( $m/z$  495.1333  $[M + H]^+$ , calcd 495.1336).  $^1\text{H}$  NMR ( $\text{CDCl}_3$ , 500 MHz)  $\delta_{\text{H}}$  11.87 (1H, s), 9.39 (1H, s), 7.10 (1H, d,  $J = 2.4$ ), 6.71 (1H, d,  $J = 2.4$ ), 6.38 (1H, t,  $J = 5.0$ ), 4.85 (1H, t,  $J = 10.0$ ), 4.43 (1H, dd,  $J = 12.0, 4.0$ ), 2.70 (1H, dd,  $J = 14.0, 7.5$ ), 2.56 (1H, dd,  $J = 14.0, 7.5$ ), 2.46 (1H, m), 2.40 (1H, m), 2.15 (2H, m), 1.93 (2H, m), 1.67 (3H, s), 1.49 (3H, s), 1.37 (3H, s), 1.19 (3H, s).  $^{13}\text{C}$  and DEPT 135 NMR ( $\text{CDCl}_3$ , 125 MHz)  $\delta_{\text{C}}$  196.7 (s), 194.7 (s), 194.0 (s), 165.1 (s), 164.6 (s), 155.2 (d), 139.6 (s), 139.5 (s), 135.2 (s), 117.1 (d), 109.5 (s), 109.4 (d), 107.9 (d), 83.7 (s), 79.4 (s), 78.9 (s), 58.8 (d), 42.7 (t), 40.6 (t), 37.8 (t), 29.0 (q), 26.8 (t), 22.3 (q), 16.3 (q), 9.1 (q). The  $^1\text{H}$  and  $^{13}\text{C}$  NMR of compound **5** were identical to those of 18-oxonapyradiomycin A1 in literature [3]. Thus **5** was identified as 18-oxonapyradiomycin A1.

Compound **6** was obtained as pale yellow oils. The molecular formula was determined as  $C_{25}H_{29}Cl_3O_5$  by HRESIMS ( $m/z$  515.1183  $[M + H]^+$ , calcd 515.1159).  $^1\text{H}$  NMR ( $\text{CDCl}_3$ , 500 MHz)  $\delta_{\text{H}}$  12.04 (1H, br s), 7.16 (1H, br s), 6.74 (1H, br s), 4.78 (1H, s), 4.75 (1H, s), 4.44 (1H, dd,  $J = 12.0, 3.5$ ), 3.78 (1H, dd,  $J = 11.5, 4.0$ ), 2.64 (1H, dd,  $J = 15.0, 8.0$ ), 2.52 (1H, dd,  $J = 13.0, 4.0$ ), 2.35 (1H, t,  $J = 12.5$ ), 2.25 (1H, dt,  $J = 13.0, 9.5$ ), 2.03 (1H, m), 1.99 (1H, br d,  $J = 8.5$ ), 1.93 (1H, ddd,  $J = 12.5, 3.5$ ), 1.72 (1H, m), 1.61 (1H, br d,  $J = 15.5$ ), 1.38 (3H, s), 1.19 (3H, s), 0.70 (3H, s), 0.58 (3H, s).  $^{13}\text{C}$  NMR and DEPT 135 ( $\text{CDCl}_3$ , 125 MHz)  $\delta_{\text{C}}$  194.0 (s), 193.5 (s), 165.5 (s), 164.1 (s), 145.4 (s), 135.1 (s), 110.3 (t), 109.5 (d), 108.6 (s), 108.4 (d), 84.3 (s), 80.9 (s), 78.8 (s), 70.8 (d), 58.8 (d), 45.9 (d), 42.8 (t), 41.8 (s), 35.6 (t), 35.0 (t), 34.6 (t), 29.0 (q), 26.4 (q), 22.4 (q), 15.5 (q). The  $^1\text{H}$  and  $^{13}\text{C}$  NMR of compound **6** were identical to those of napyradiomycin B1 in literature [1,2]. Thus **6** was identified as napyradiomycin B1.

Compound **7** was obtained as pale yellow oils. The molecular formula was determined as  $C_{25}H_{29}BrCl_2O_5$  by HRESIMS ( $m/z$  559.0662  $[M + H]^+$ , calcd 559.0654).  $^1\text{H}$  NMR ( $\text{CDCl}_3$ , 500 MHz)  $\delta_{\text{H}}$  12.03 (1H, br s), 7.15 (1H, br s), 6.74 (1H, br s), 4.78 (1H, s), 4.76 (1H, s), 4.45 (1H, dd,  $J = 12.0, 4.0$ ), 4.03 (1H, dd,  $J = 11.0, 4.0$ ), 2.66 (1H, dd,  $J = 15.0, 8.5$ ), 2.53 (1H, dd,  $J = 14.0, 4.0$ ), 2.35 (1H, dd,  $J = 12.0, 4.0$ ), 2.21 (1H, m), 2.19 (1H, m), 2.04 (1H, br d,  $J = 8.0$ ), 1.93 (1H, m), 1.92 (1H, m), 1.63 (1H, br d,  $J = 15.0$ ), 1.38 (3H, s), 1.20 (3H, s), 0.73 (3H, s), 0.63 (3H, s).  $^{13}\text{C}$  and DEPT 135 NMR ( $\text{CDCl}_3$ , 125 MHz)  $\delta_{\text{C}}$  194.0 (s), 193.5 (s), 165.5 (s), 164.2 (s), 145.3 (s), 135.1 (s), 110.2 (t), 109.5 (d), 108.6 (s), 108.5 (d), 84.3 (s), 80.9 (s), 78.8 (s), 66.7 (d), 58.8 (d), 45.8 (d), 42.8 (t), 41.8 (s), 37.3 (t), 36.0 (t), 35.4 (t), 29.0 (q), 27.8 (q), 22.4 (q), 16.4 (q). The  $^1\text{H}$  and  $^{13}\text{C}$  NMR of compound **7** were identical to those of napyradiomycin B3 in literature [1,2]. Thus compound **7** was identified as napyradiomycin B3.

Compound **8** was obtained as pale yellow oils. The molecular formula was determined as  $C_{25}H_{31}ClO_5$  by HRESIMS ( $m/z$  469.1757  $[M + Na]^+$ , calcd 469.1752).  $^1H$  NMR ( $CDCl_3$ , 500 MHz)  $\delta_H$  11.97 (1H, br s), 7.04 (1H, s), 6.71 (1H, s), 5.01 (1H, dd,  $J = 8.0, 8.0$ ), 4.92 (1H, dd,  $J = 8.0, 8.0$ ), 4.82 (1H, dd,  $J = 8.0, 8.0$ ), 3.00 (1H, m), 2.96 (1H, m), 2.47 (1H, br dd,  $J = 15.0, 8.0$ ), 2.29 (1H, dd,  $J = 13.5, 8.0$ ), 1.95 (1H, m), 1.89 (1H, m), 1.69 (3H, s), 1.58 (3H, s), 1.55 (3H, s), 1.29 (3H, s), 1.28 (3H, s).  $^{13}C$  NMR and DEPT 135 ( $CD_3OD$ , 125 MHz)  $\delta_C$  197.5 (s), 196.5 (s), 167.4 (s), 166.0 (s), 141.0 (s), 138.5 (s), 136.8 (s), 132.5 (s), 125.1 (d), 118.3 (d), 117.8 (d), 111.0 (s), 109.1 (d), 108.5 (d), 86.0 (s), 85.1 (s), 40.9 (t), 39.6 (t), 39.7 (t), 27.5 (t), 25.9 (q), 25.9 (q), 17.8 (q), 17.7 (q), 16.2 (q). The  $^1H$  and  $^{13}C$  NMR of compound **8** were identical to those of naphthomevalin in literature [4]. Thus compound **8** was identified as naphthomevalin.

Compound **9** was obtained as pale yellow oils. The molecular formula was determined as  $C_{25}H_{26}Cl_2O_5$  by HRESIMS ( $m/z$  477.1238  $[M + H]^+$ , calcd 477.1230).  $^1H$  NMR ( $CDCl_3$ , 500 MHz)  $\delta_H$  12.23 (1H, s), 6.89 (1H, s), 5.15 (1H, dd,  $J = 11.5, 3.5$ ), 4.59 (2H, s), 4.47 (1H, m), 4.46 (1H, m), 3.74 (1H, d,  $J = 12.0$ ), 2.91 (1H, d,  $J = 12.0$ ), 2.65 (1H, dd,  $J = 14.5, 4.0$ ), 2.48 (2H, m), 2.47 (1H, m), 2.12 (1H, m), 2.01 (1H, m), 1.86 (1H, m), 1.52 (3H, s), 1.37 (3H, s), 1.14 (3H, s).  $^{13}C$  and DEPT 135 NMR ( $CDCl_3$ , 125 MHz)  $\delta_C$  196.4 (s), 194.5 (s), 164.8 (s), 157.9 (s), 138.0 (s), 134.1 (s), 133.7 (s), 132.1 (s), 131.4 (s), 116.7 (d), 113.7 (d), 112.4 (s), 85.7 (s), 79.3 (s), 76.3 (s), 69.0 (t), 58.7 (d), 43.2 (t), 42.0 (t), 39.6 (t), 31.8 (t), 29.4 (q), 24.7 (t), 22.0 (q), 14.8 (q). The  $^1H$  and  $^{13}C$  NMR of compound **9** were identical to those of napyradiomycin SR in literature [3]. Thus compound **9** was identified as napyradiomycin SR.

**Table S1.** NMR data of napyradiomycin A1 (**4**) (measured in CDCl<sub>3</sub>, at 500 MHz for <sup>1</sup>H and 125 MHz for <sup>13</sup>C with reference to the solvent signals,  $\delta$  in ppm).

| No.                | $\delta_c$ | $\delta_H$ (J in Hz)                        | HMBC                       | COSY |
|--------------------|------------|---------------------------------------------|----------------------------|------|
| 2                  | 79.0 s     |                                             |                            |      |
| 2-CH <sub>3</sub>  | 29.0 q     | 1.50 s                                      | 2, 3                       |      |
| 2-CH <sub>3</sub>  | 22.4 q     | 1.18 s                                      | 2, 3, 2-CH <sub>3</sub>    |      |
| 3                  | 59.0 d     | 4.43 dd (4.5, 11.5)                         | 2                          | 4    |
| 4                  | 42.9 t     | 2.48 dd (4.5, 14.0)<br>2.41 dd (11.5, 14.0) | 2, 3, 4a, 10               | 3    |
| 4a                 | 79.2 s     |                                             |                            |      |
| 5                  | 194.0 s    |                                             |                            |      |
| 5a                 | 110.5 s    |                                             |                            |      |
| 6                  | 165.0 s    |                                             |                            |      |
| 6-OH               |            | 11.84 s                                     | 5a, 6, 7                   |      |
| 7                  | 109.7 d    | 6.73 d (2.5)                                | 5a, 6, 9                   |      |
| 8                  | 163.7 s    |                                             |                            |      |
| 9                  | 107.9 d    | 7.23 d (2.5)                                | 5a, 10                     |      |
| 9a                 | 135.6 s    |                                             |                            |      |
| 10                 | 196.3 s    |                                             |                            |      |
| 10a                | 83.8 s     |                                             |                            |      |
| 11                 | 41.5 t     | 2.70 br d (8.0)                             | 4a, 10, 10a, 12, 13        | 12   |
| 12                 | 115.1 d    | 4.71 br t (8.0)                             | 11, 13-CH <sub>3</sub>     | 11   |
| 13                 | 143.0 s    |                                             |                            |      |
| 13-CH <sub>3</sub> | 16.6 q     | 1.32 s                                      | 12, 13, 14                 |      |
| 14                 | 39.9 t     | 1.60 m                                      | 15, 16, 17                 |      |
| 15                 | 26.2 t     | 1.60 m                                      |                            | 16   |
| 16                 | 123.9 d    | 4.89 br s                                   |                            | 15   |
| 17                 | 131.9 s    |                                             |                            |      |
| 17-CH <sub>3</sub> | 17.7 q     | 1.50 s                                      | 16, 17, 17-CH <sub>3</sub> |      |
| 17-CH <sub>3</sub> | 25.8 q     | 1.62 s                                      | 17-CH <sub>3</sub>         |      |

**Figure S1.** Phylogenetic dendrogram of the strain *Streptomyces* sp. SCSIO 10428 and its closest relatives reconstructed by the neighbor-joining method based on 16S rDNA gene sequences.

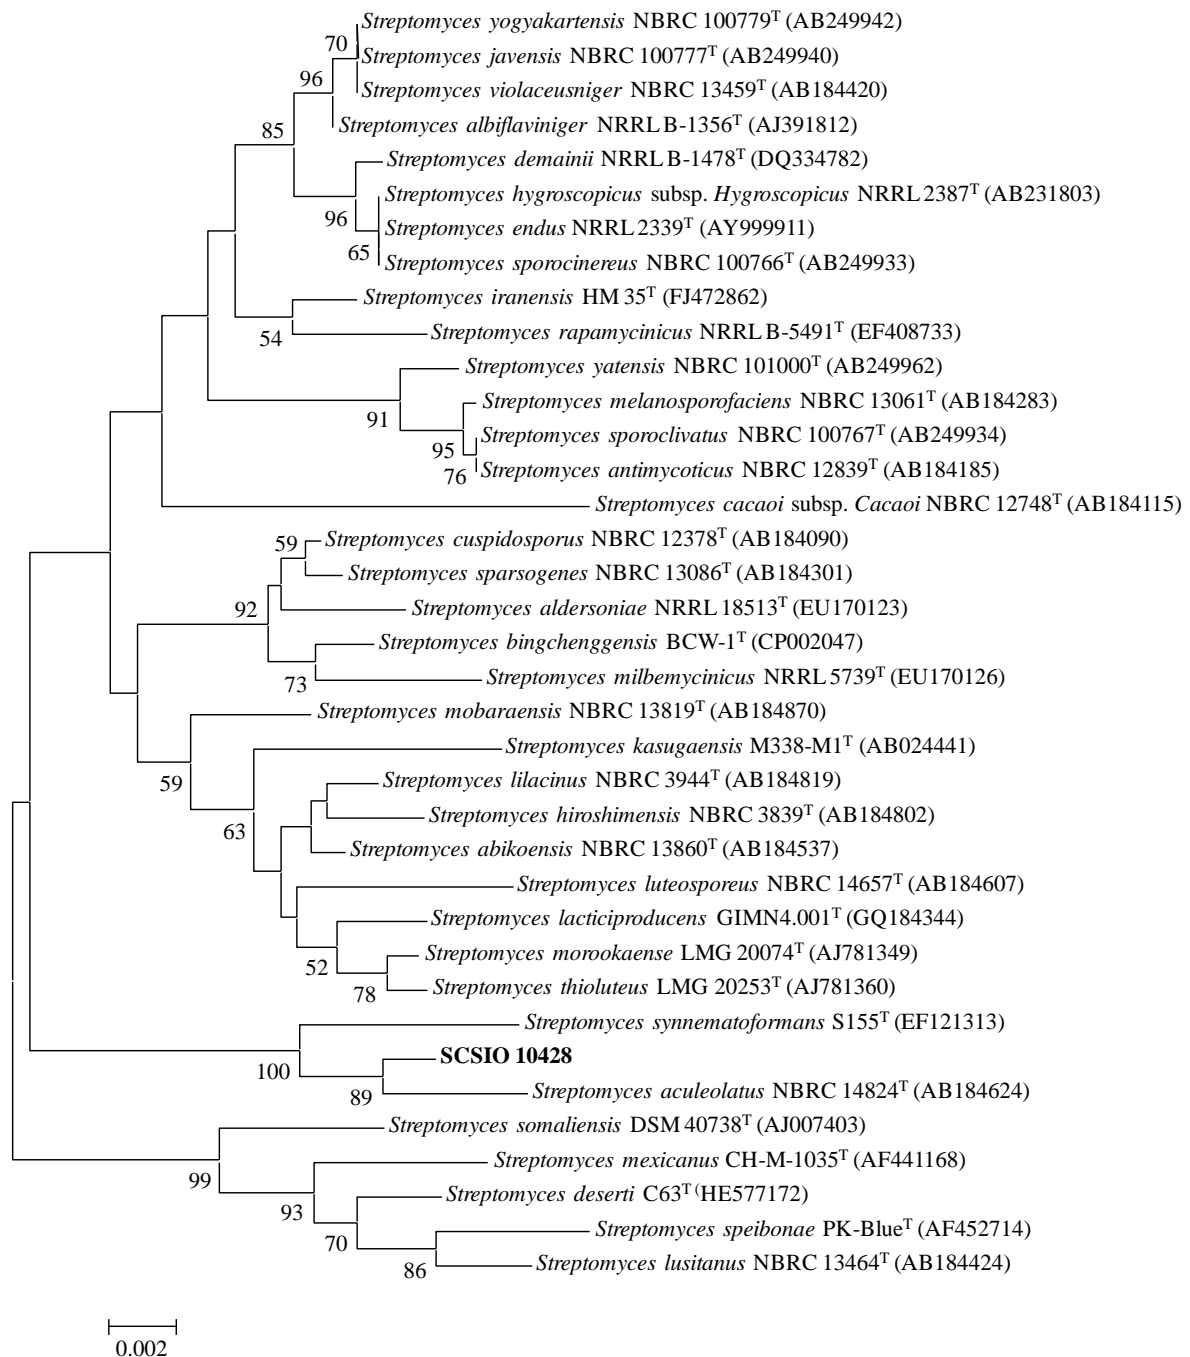

**Figure S2.** Spectral data for compound **1**. (A) HRESIMS (a), IR (b) and UV (c) spectra of compound **1**.

(a) HRESIMS spectrum of compound **1**.

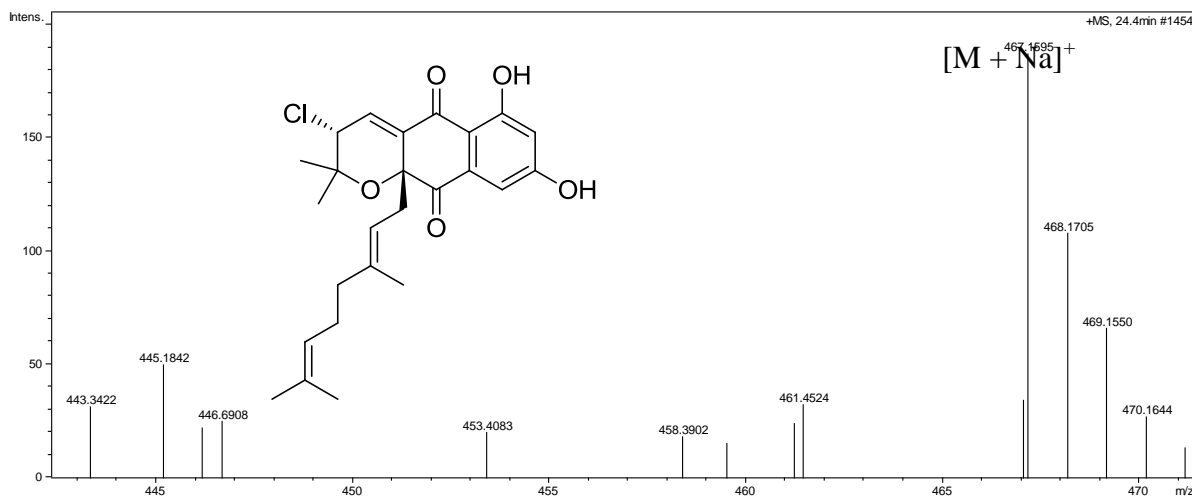

(b) IR spectrum of compound **1**.

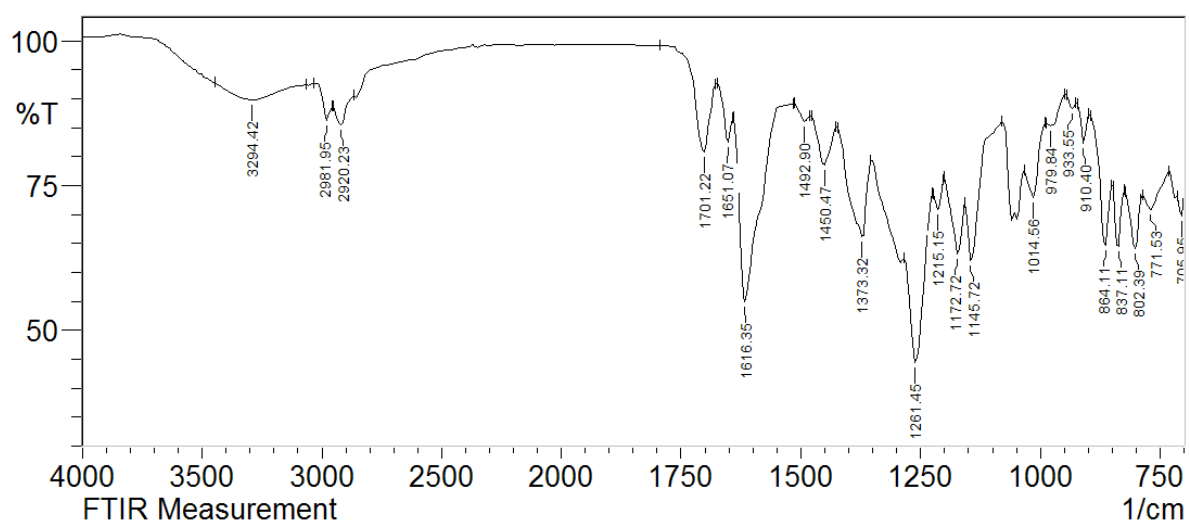

(c) The UV spectrum of compound **1**.

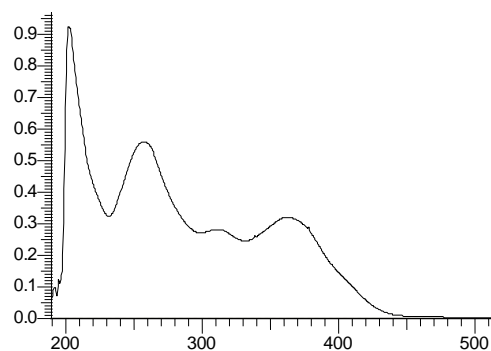

**Figure S2. (B)** The  $^1\text{H}$  NMR spectrum of compound **1** measured in  $\text{CDCl}_3$ .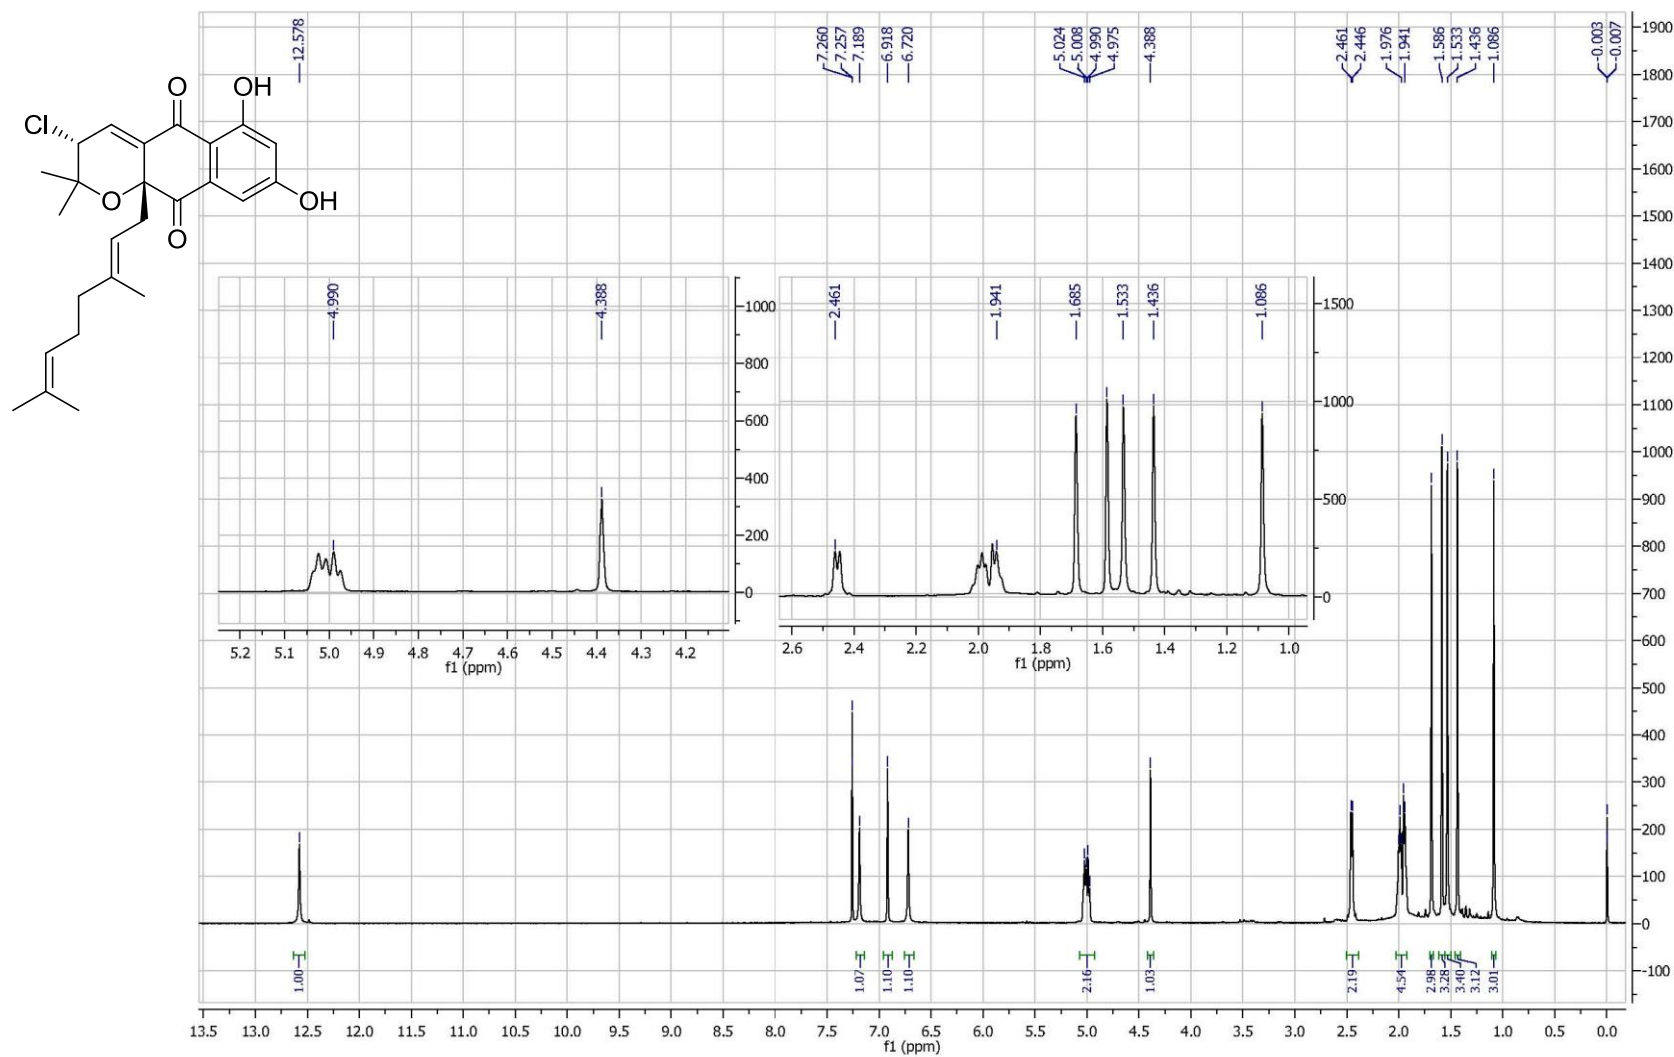

**Figure S2.** (C) The  $^{13}\text{C}$  and the DEPT 135 NMR spectra of compound **1** measured in  $\text{CDCl}_3$ .

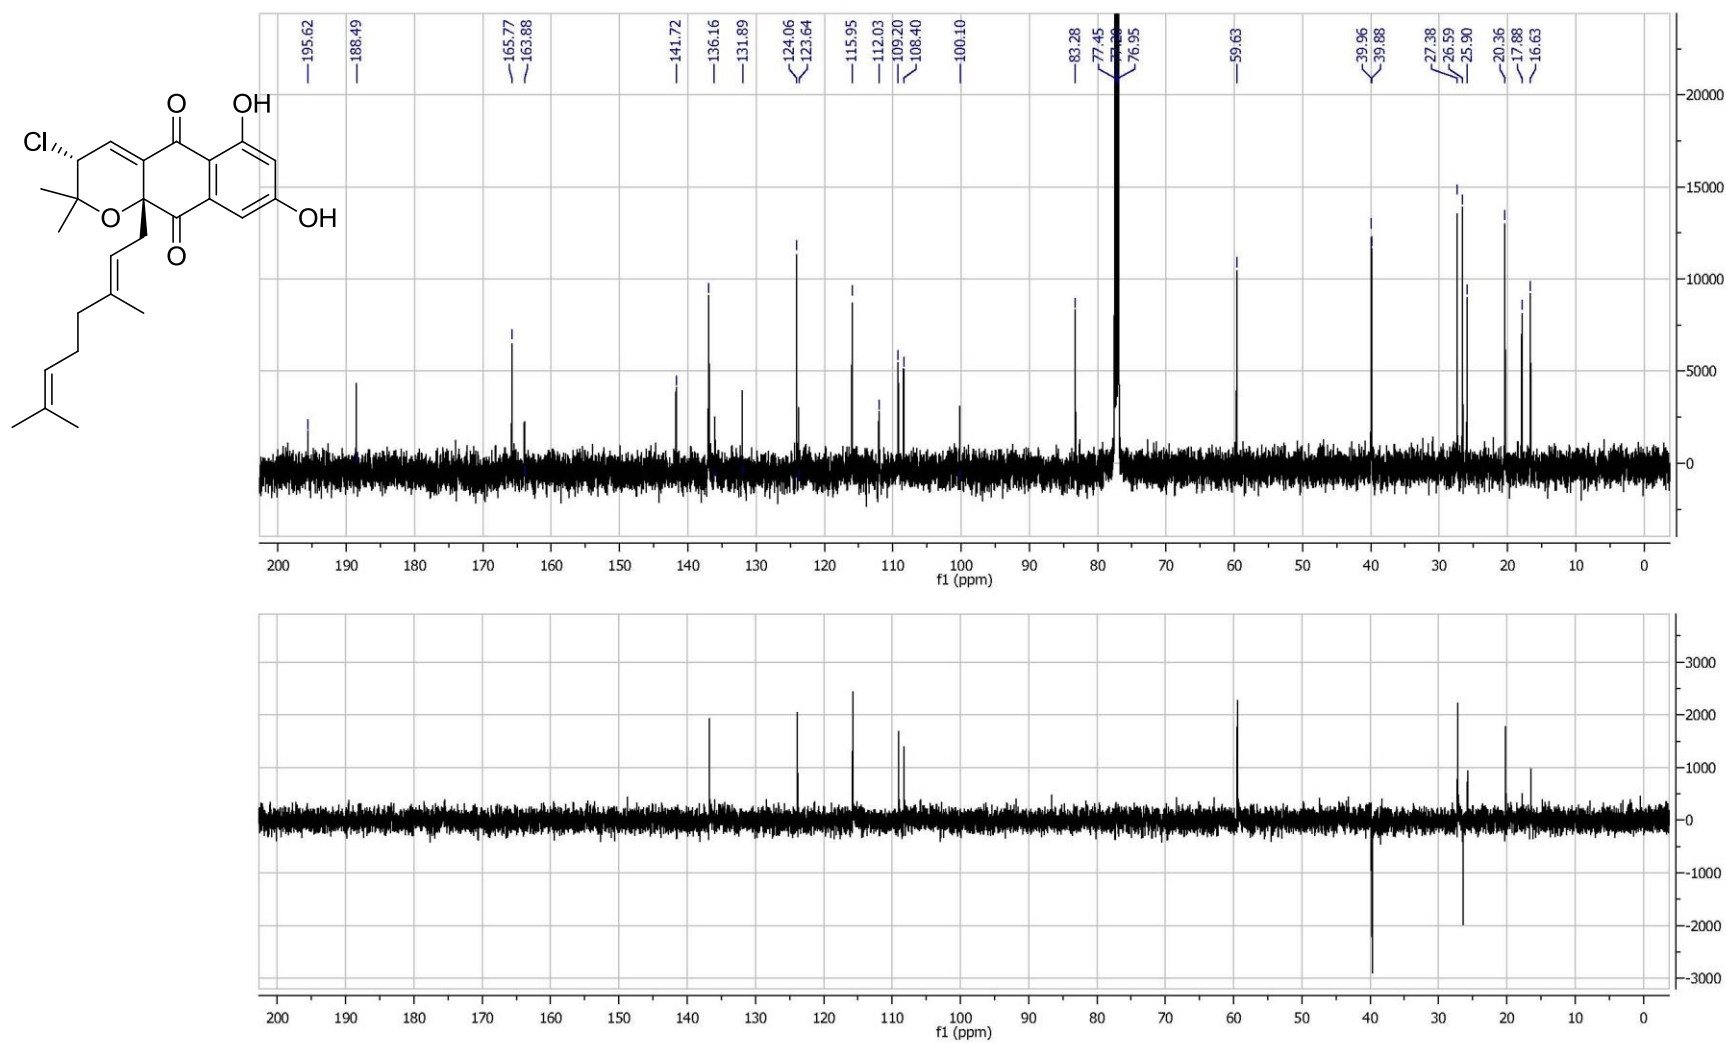



**Figure S2. (D)** The HSQC spectrum of compound **1** measured in CDCl<sub>3</sub>.

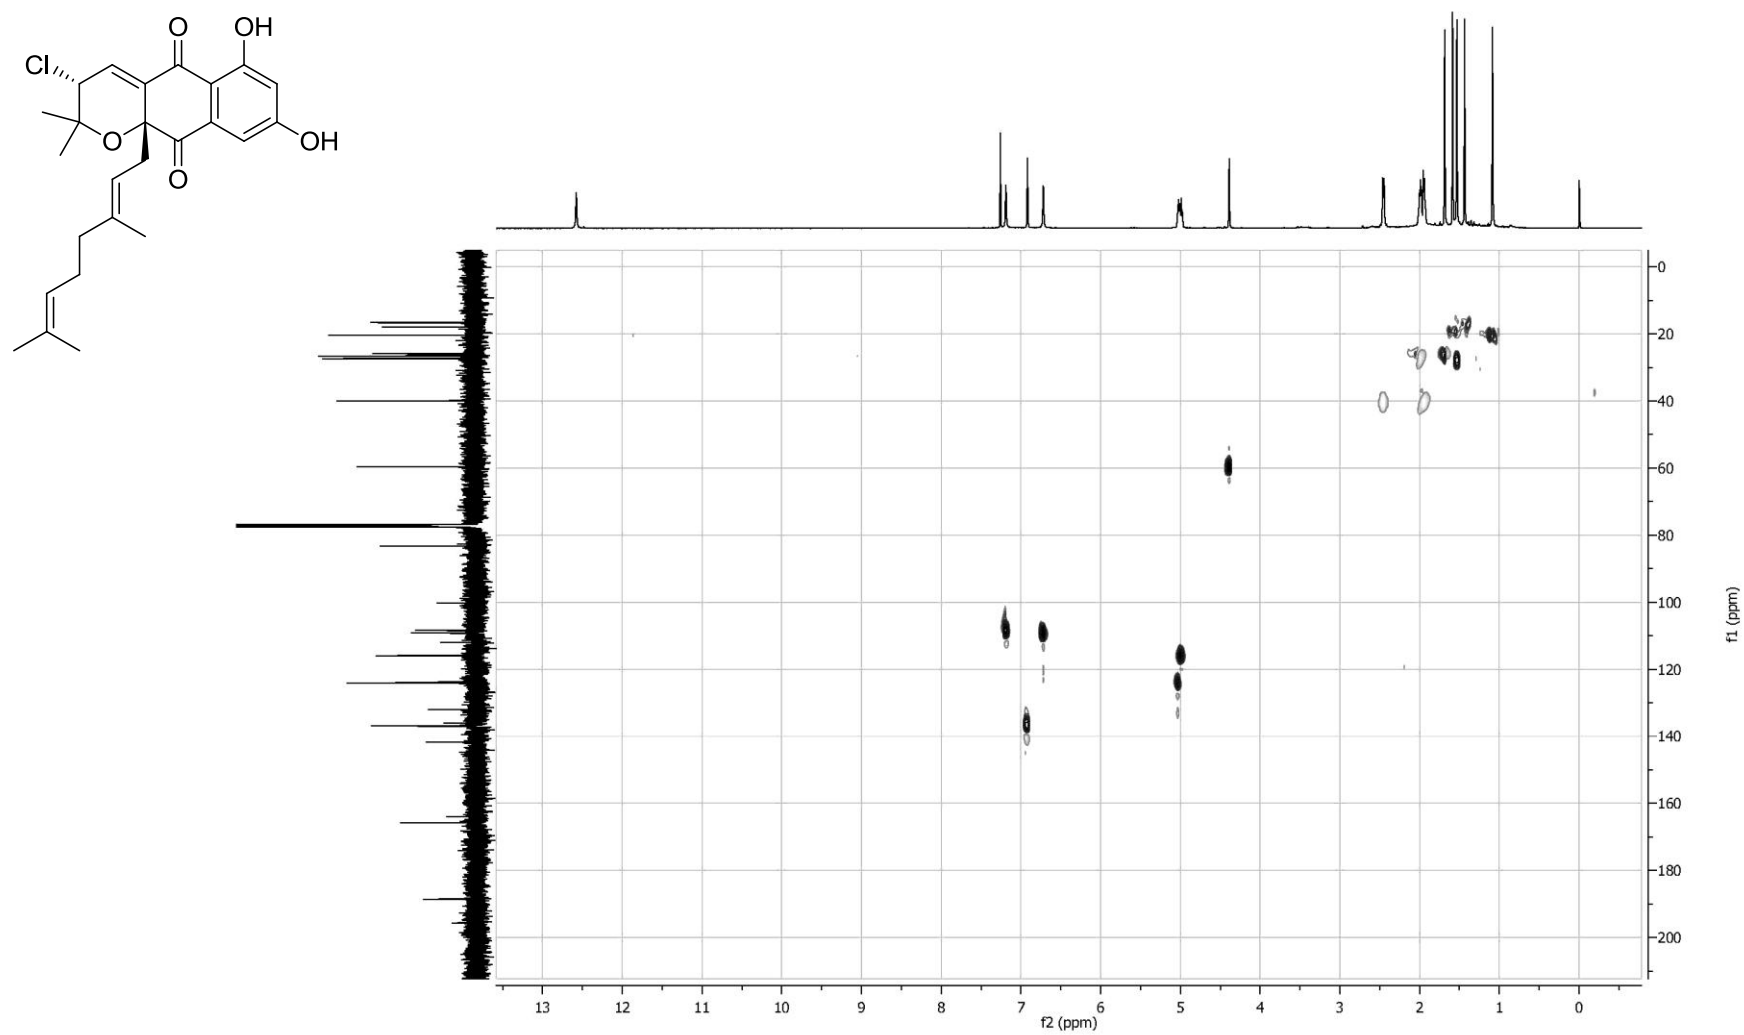

**Figure S2. (E)** The HMBC spectrum of compound **1** measured in  $\text{CDCl}_3$ .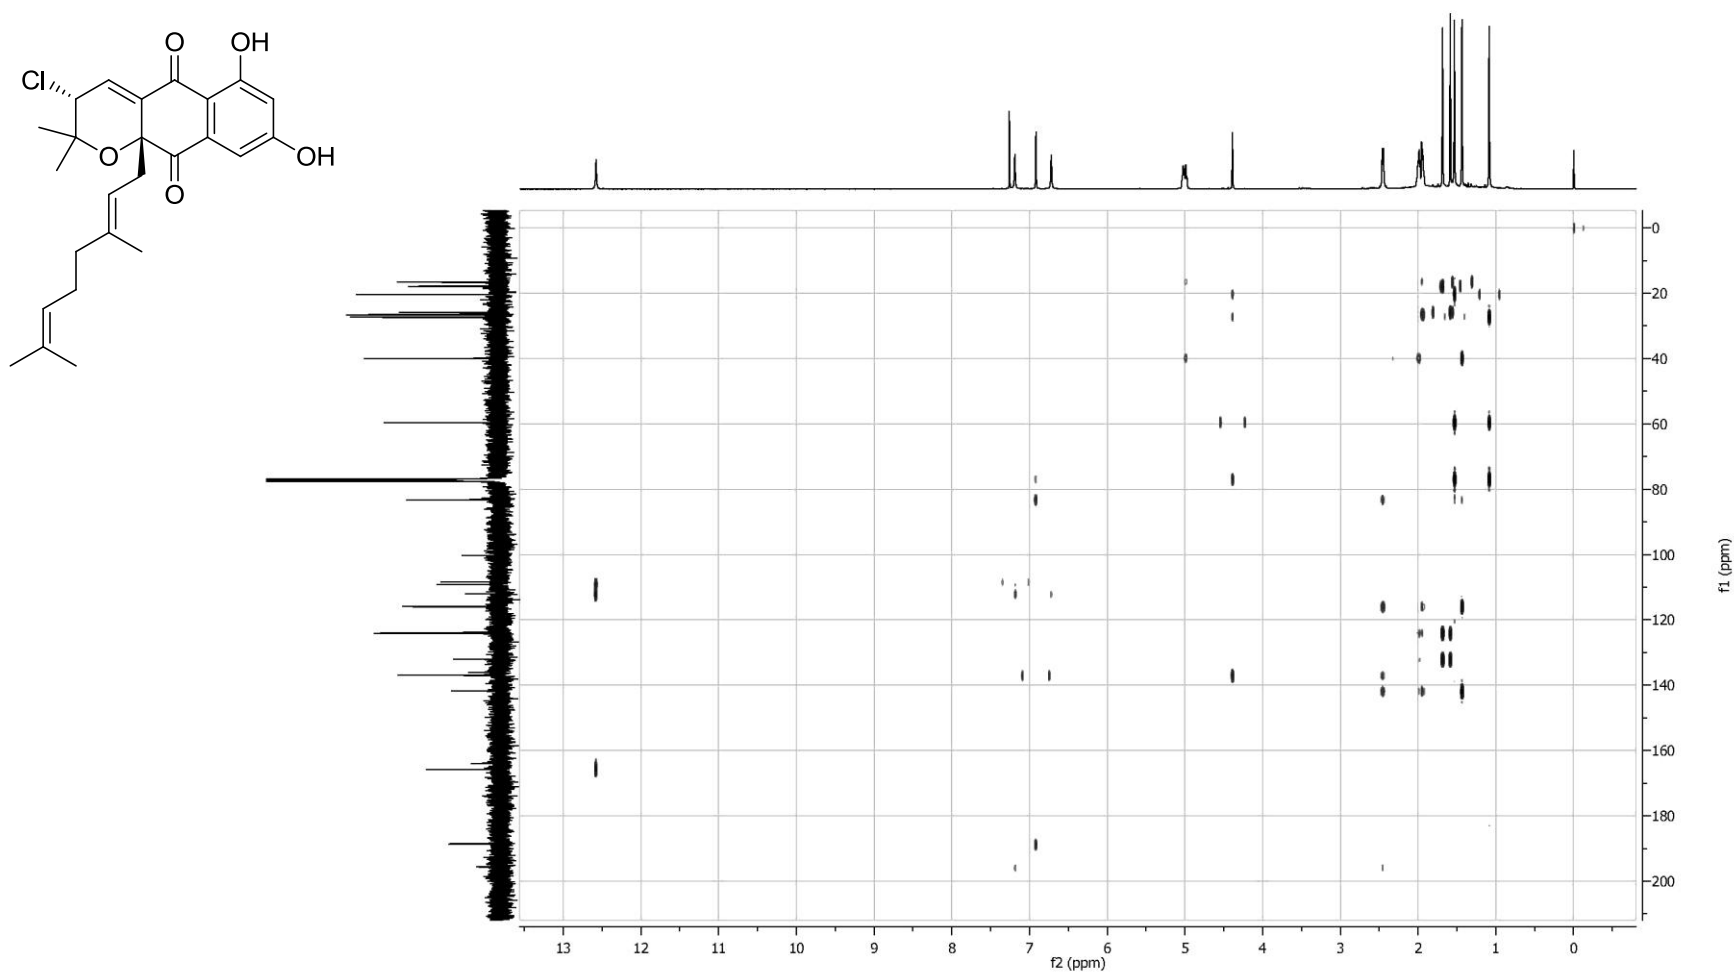

**Figure S2. (F)** The COSY spectrum of compound **1** measured in CDCl<sub>3</sub>.

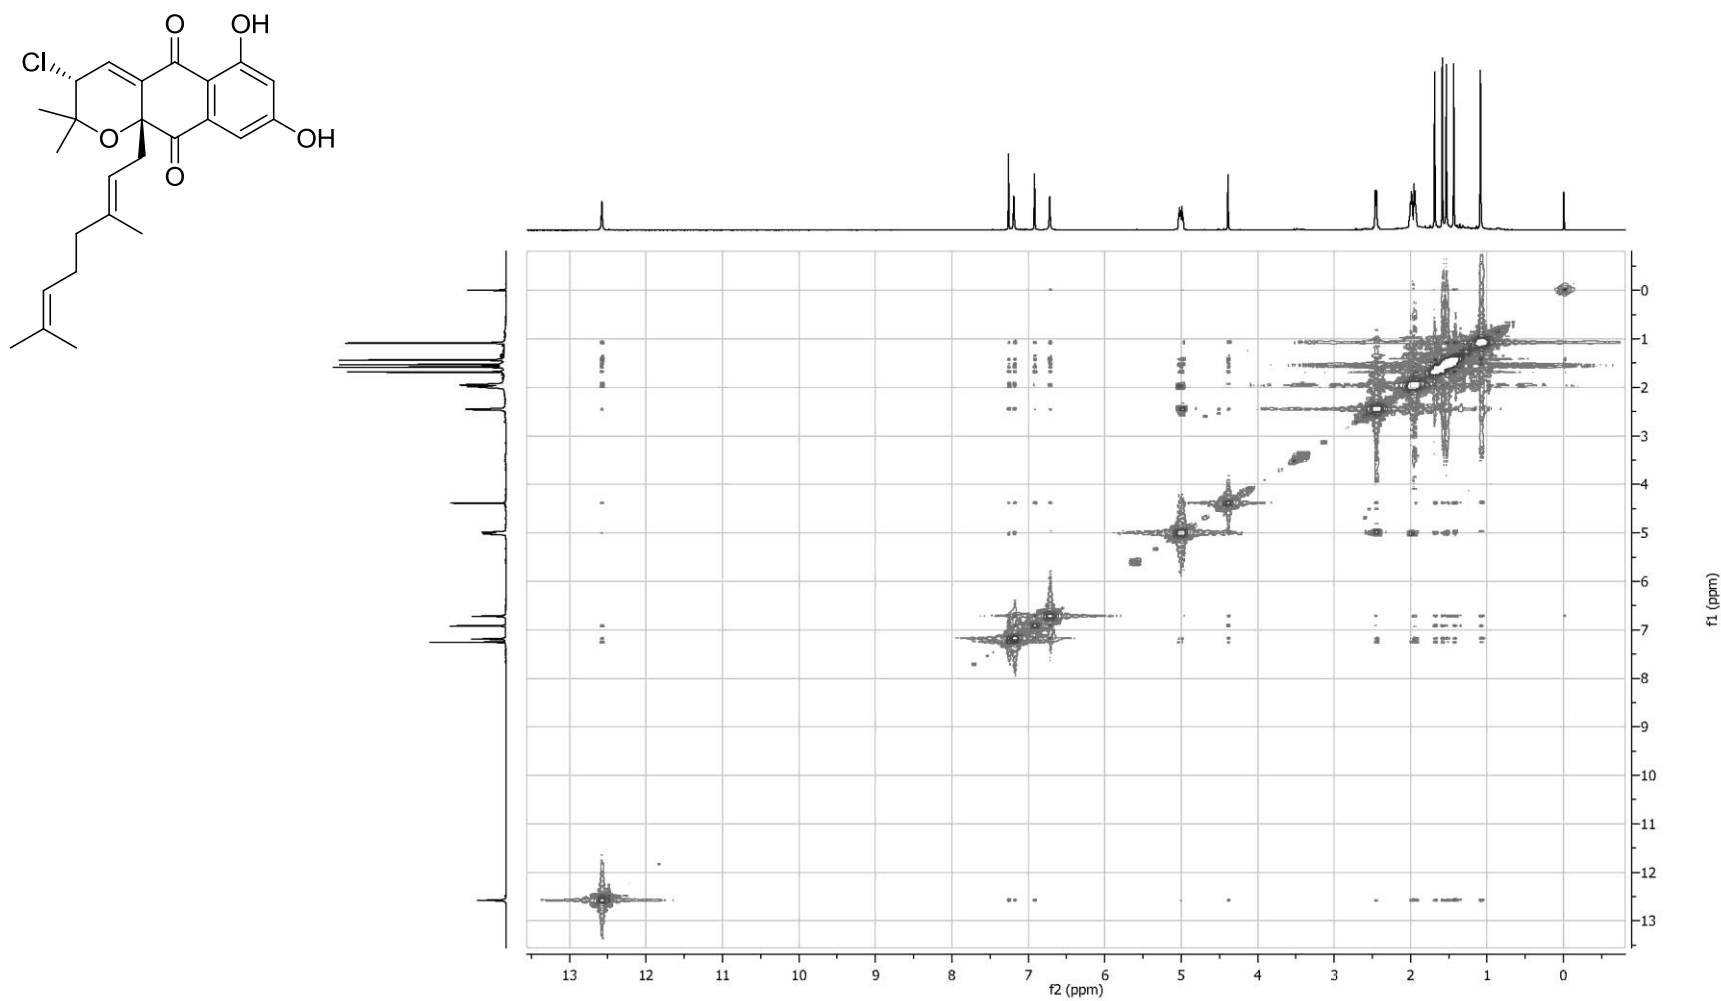

**Figure S3.** Spectral data for compound **2**. (A) HRESIMS (a), IR (b) and UV (c) spectra of compound **2**.

(a) HRESIMS spectrum of compound **2**.

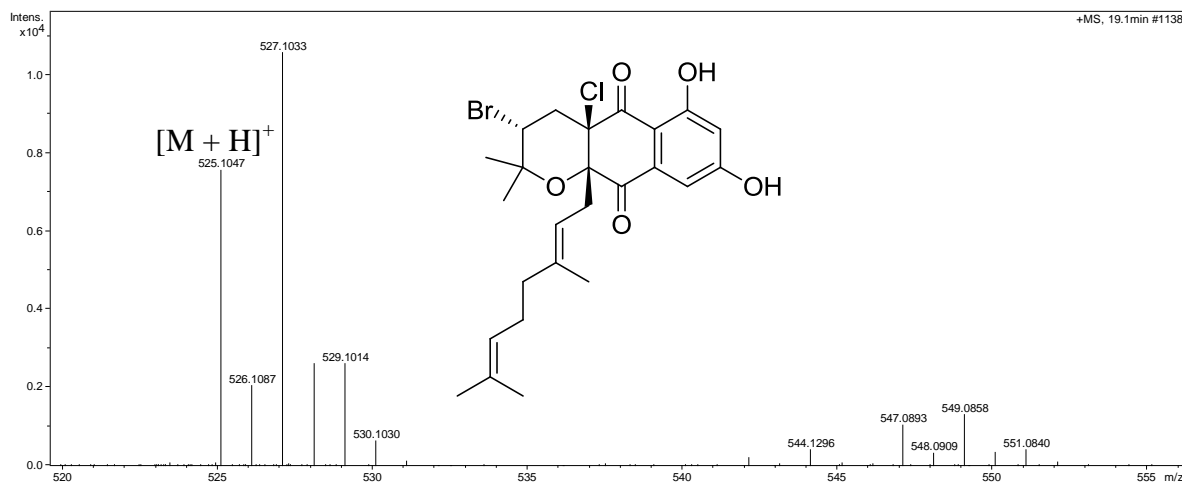

(b). IR spectrum of compound **2**.

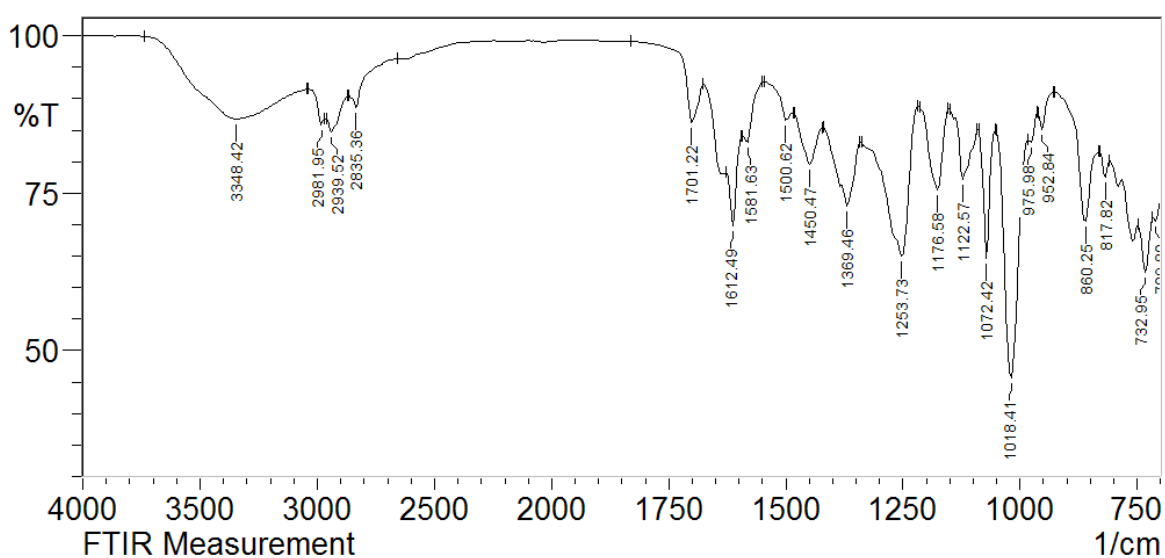

(c) UV spectrum of compound **2**.

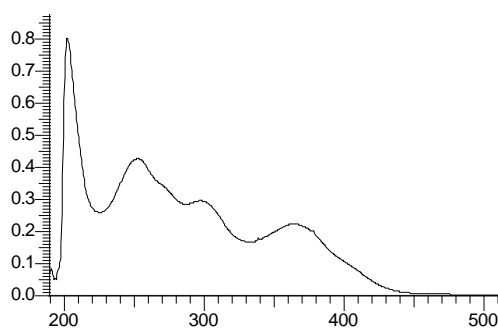

**Figure S3. (B)** The  $^1\text{H}$  NMR spectrum of compound **2** measured in  $\text{CDCl}_3$ .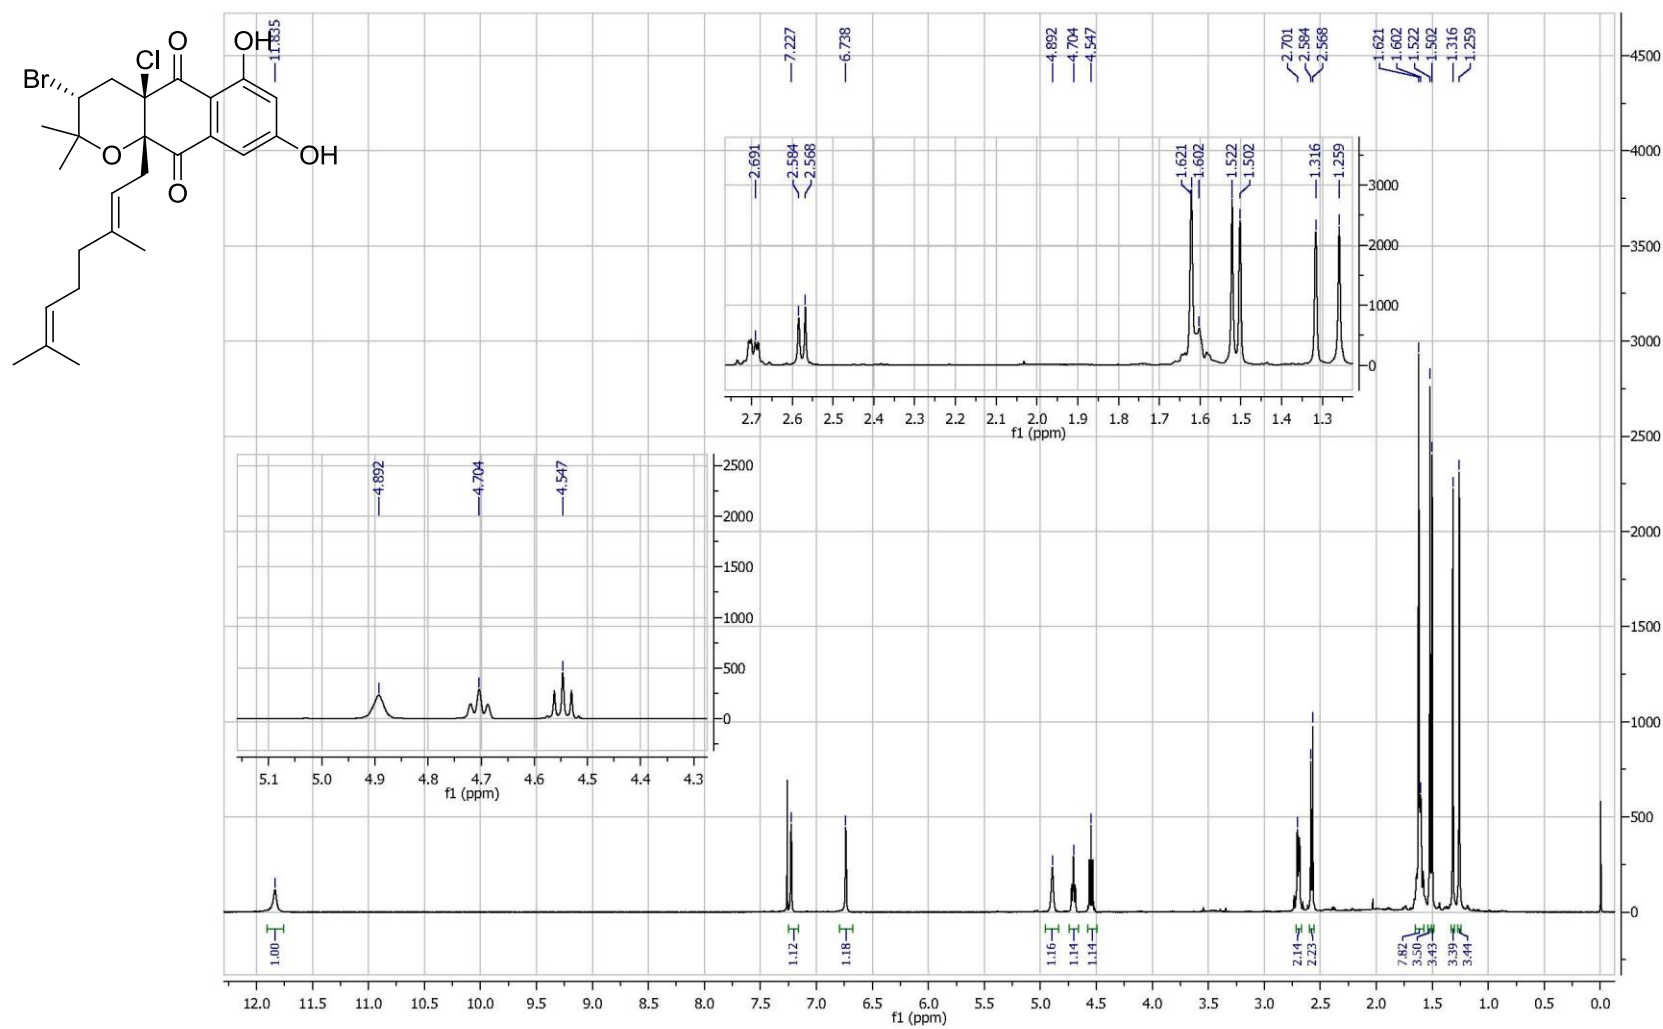

**Figure S3.** (C) The  $^{13}\text{C}$  and the DEPT 135 NMR spectra of compound **2** measured in  $\text{CDCl}_3$ .

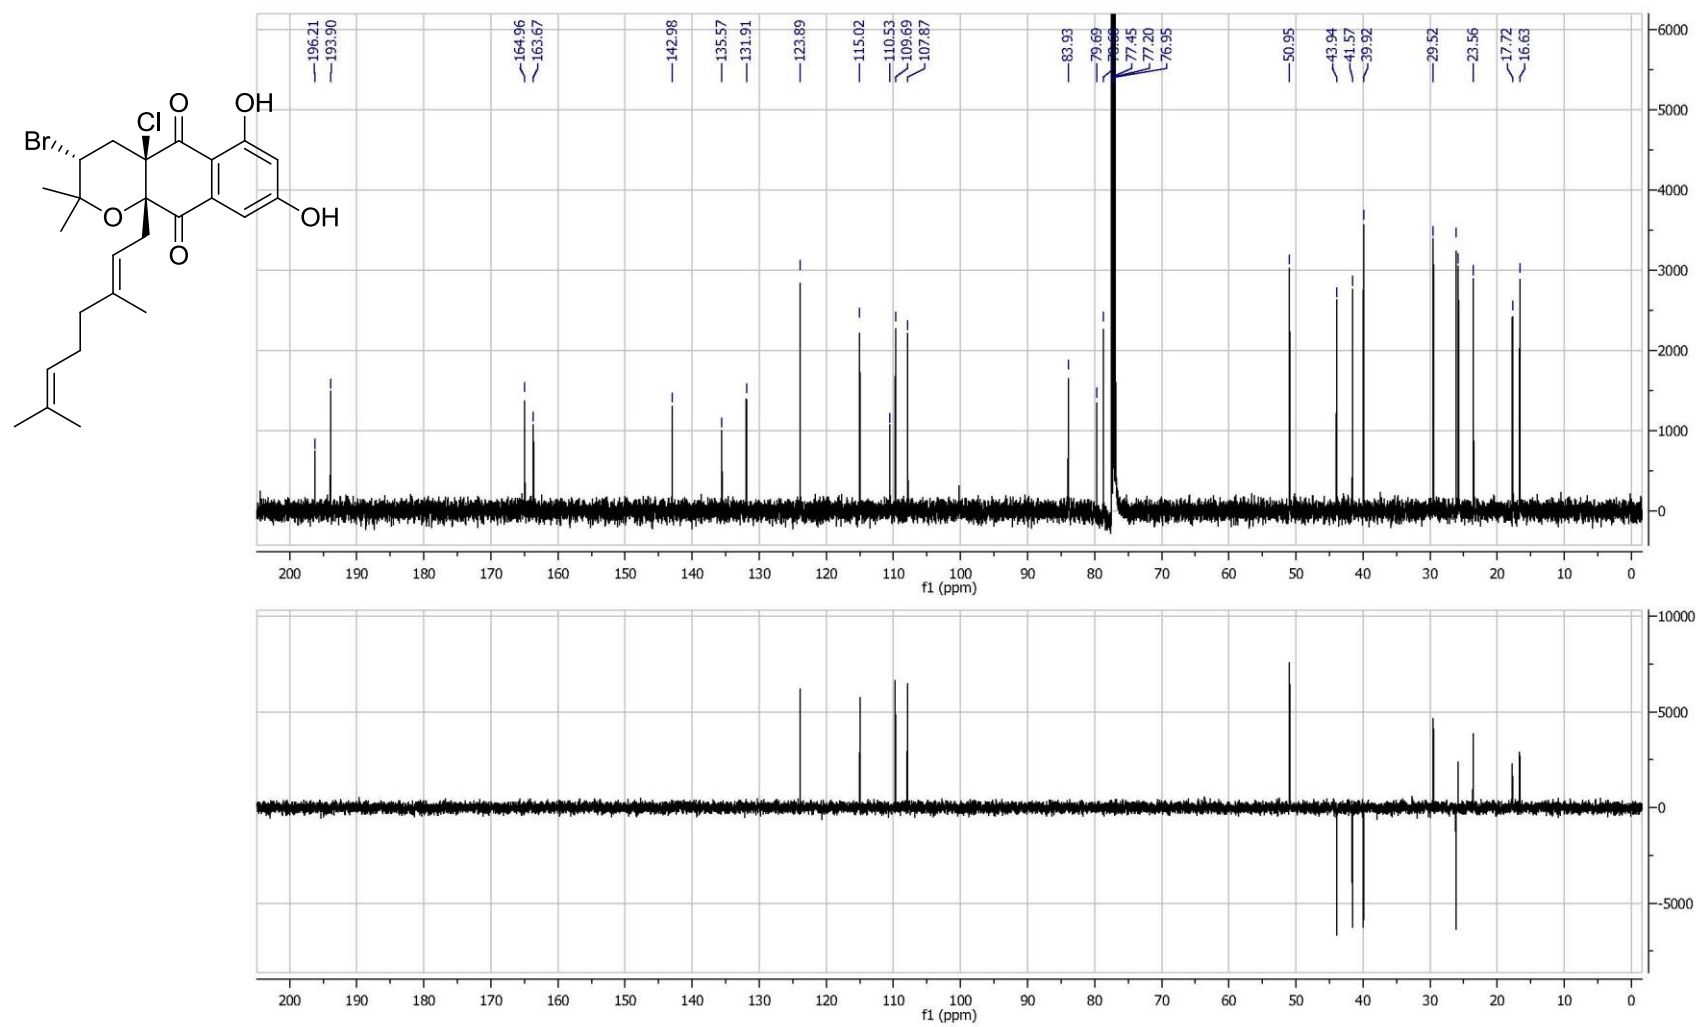

**Figure S3. (D)** The HSQC spectrum of compound **2** measured in CDCl<sub>3</sub>.

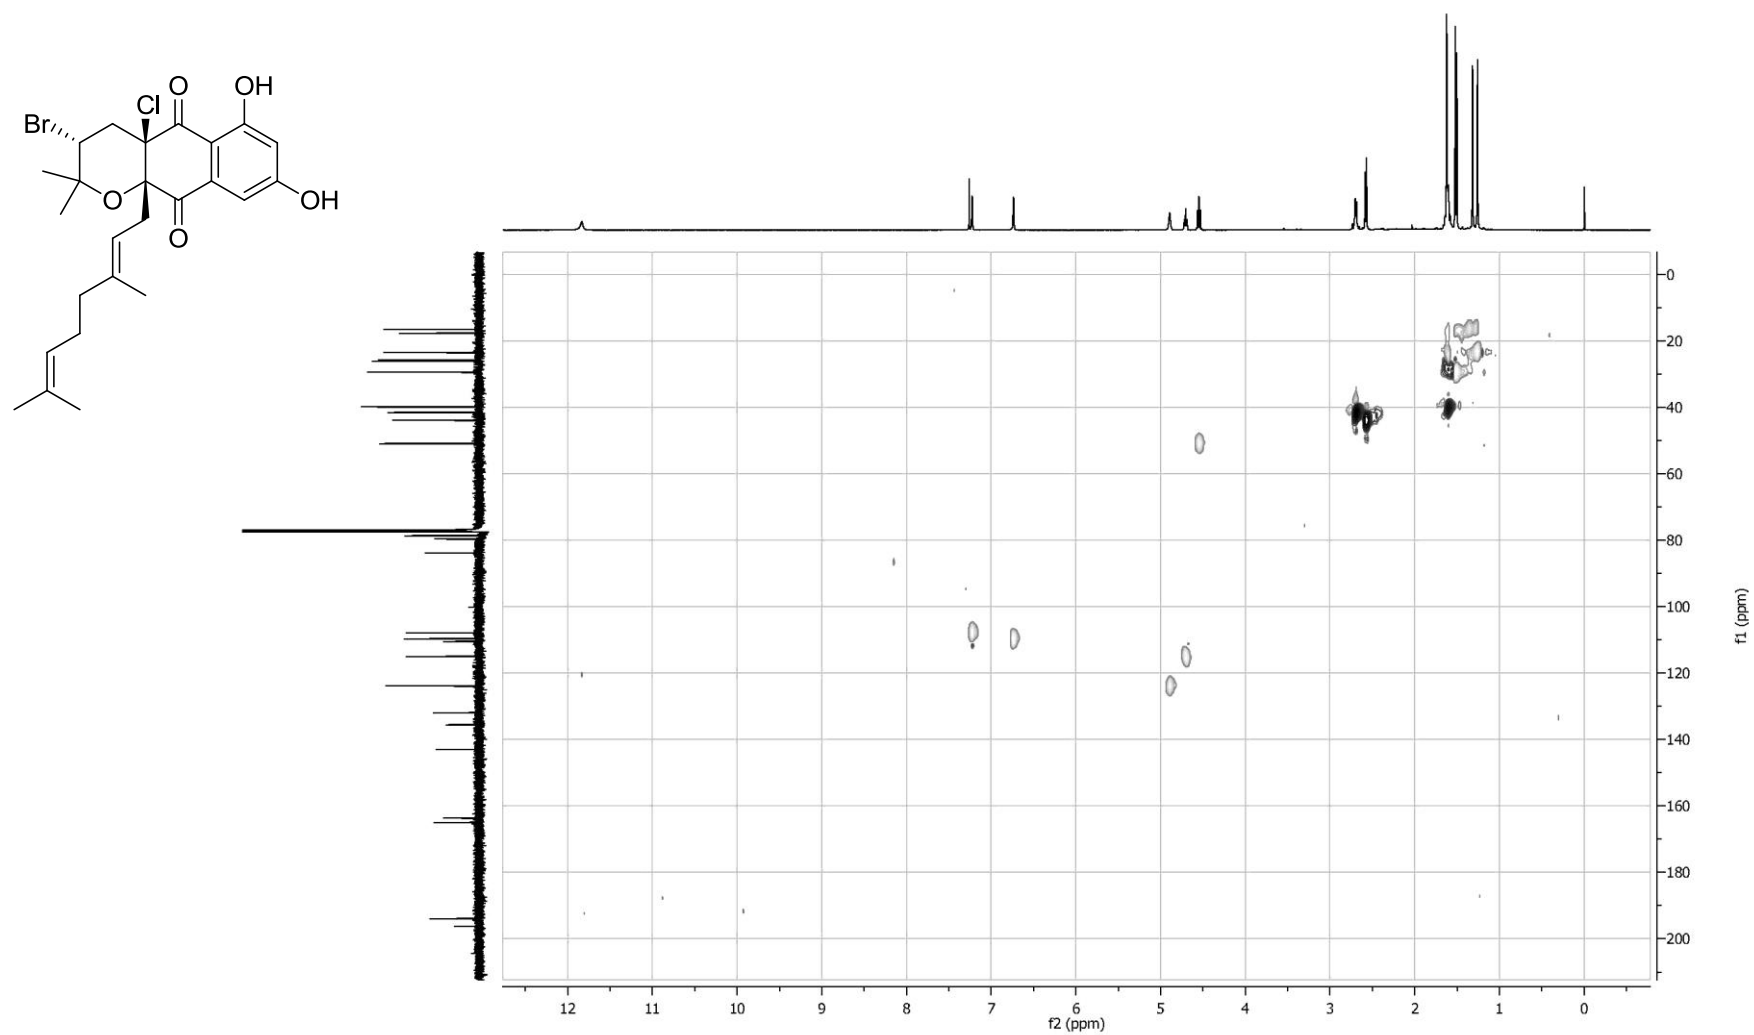

**Figure S3. (E)** The HMBC spectrum of compound **2** measured in  $\text{CDCl}_3$ .

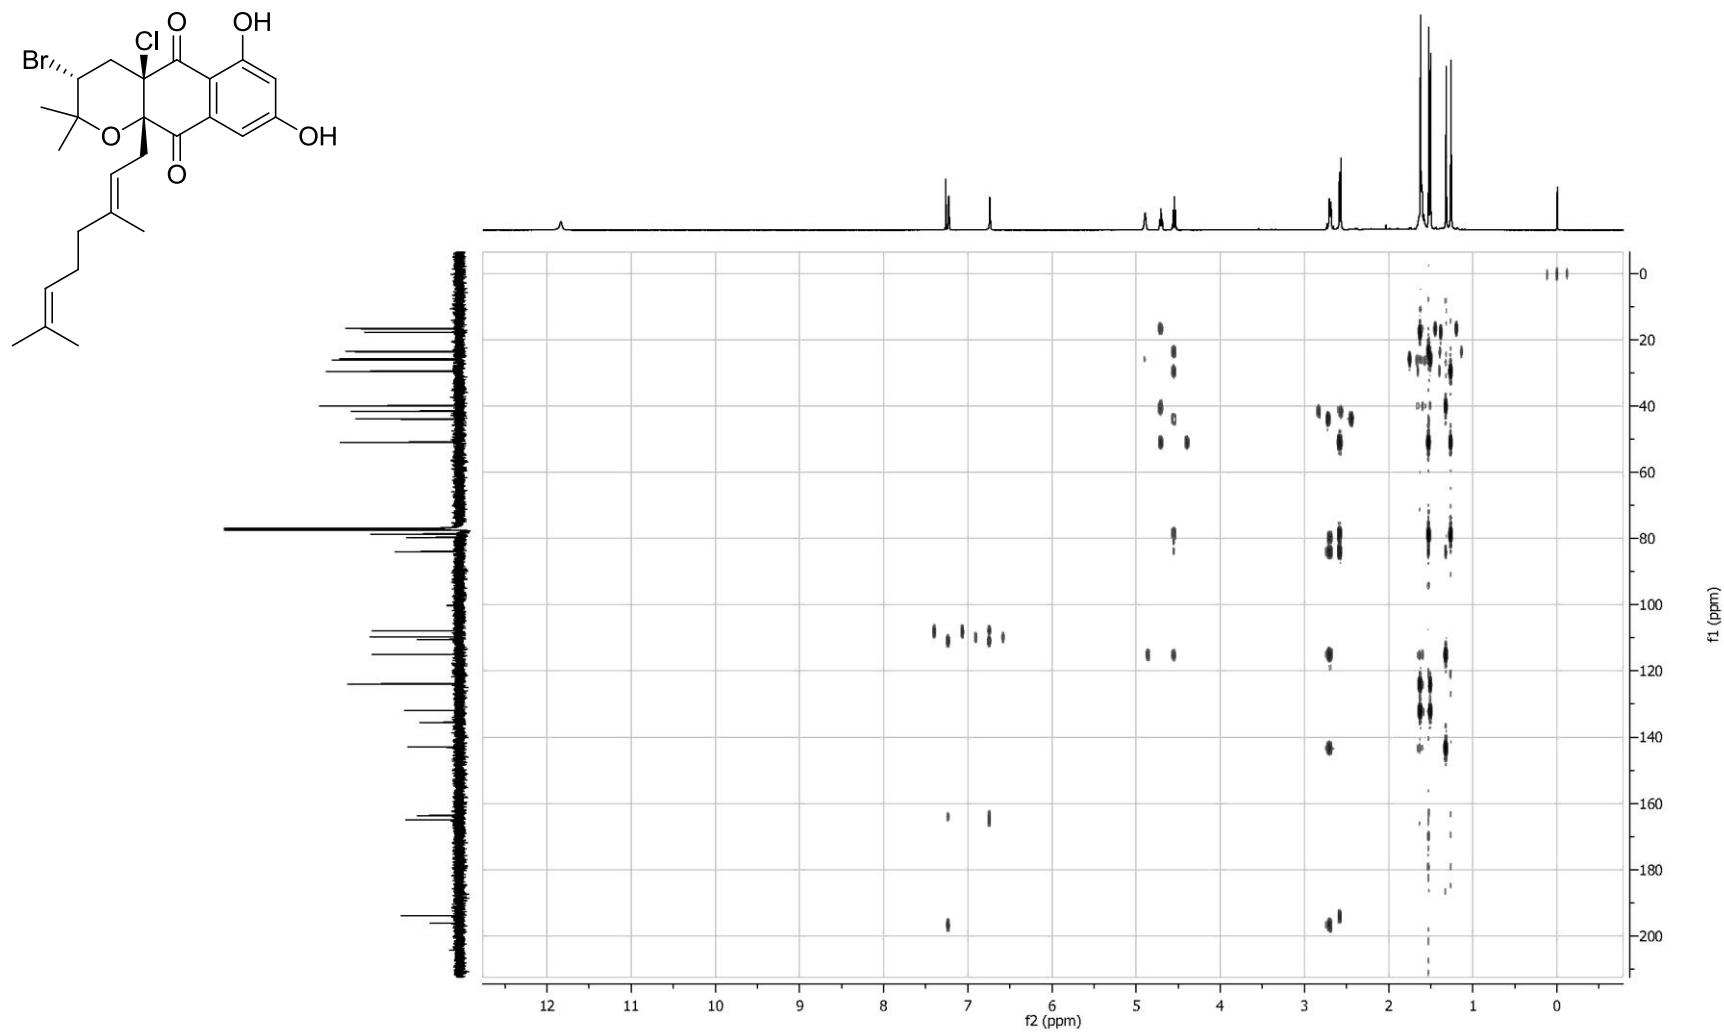



**Figure S3. (F)** The COSY spectrum of compound **2** measured in CDCl<sub>3</sub>.

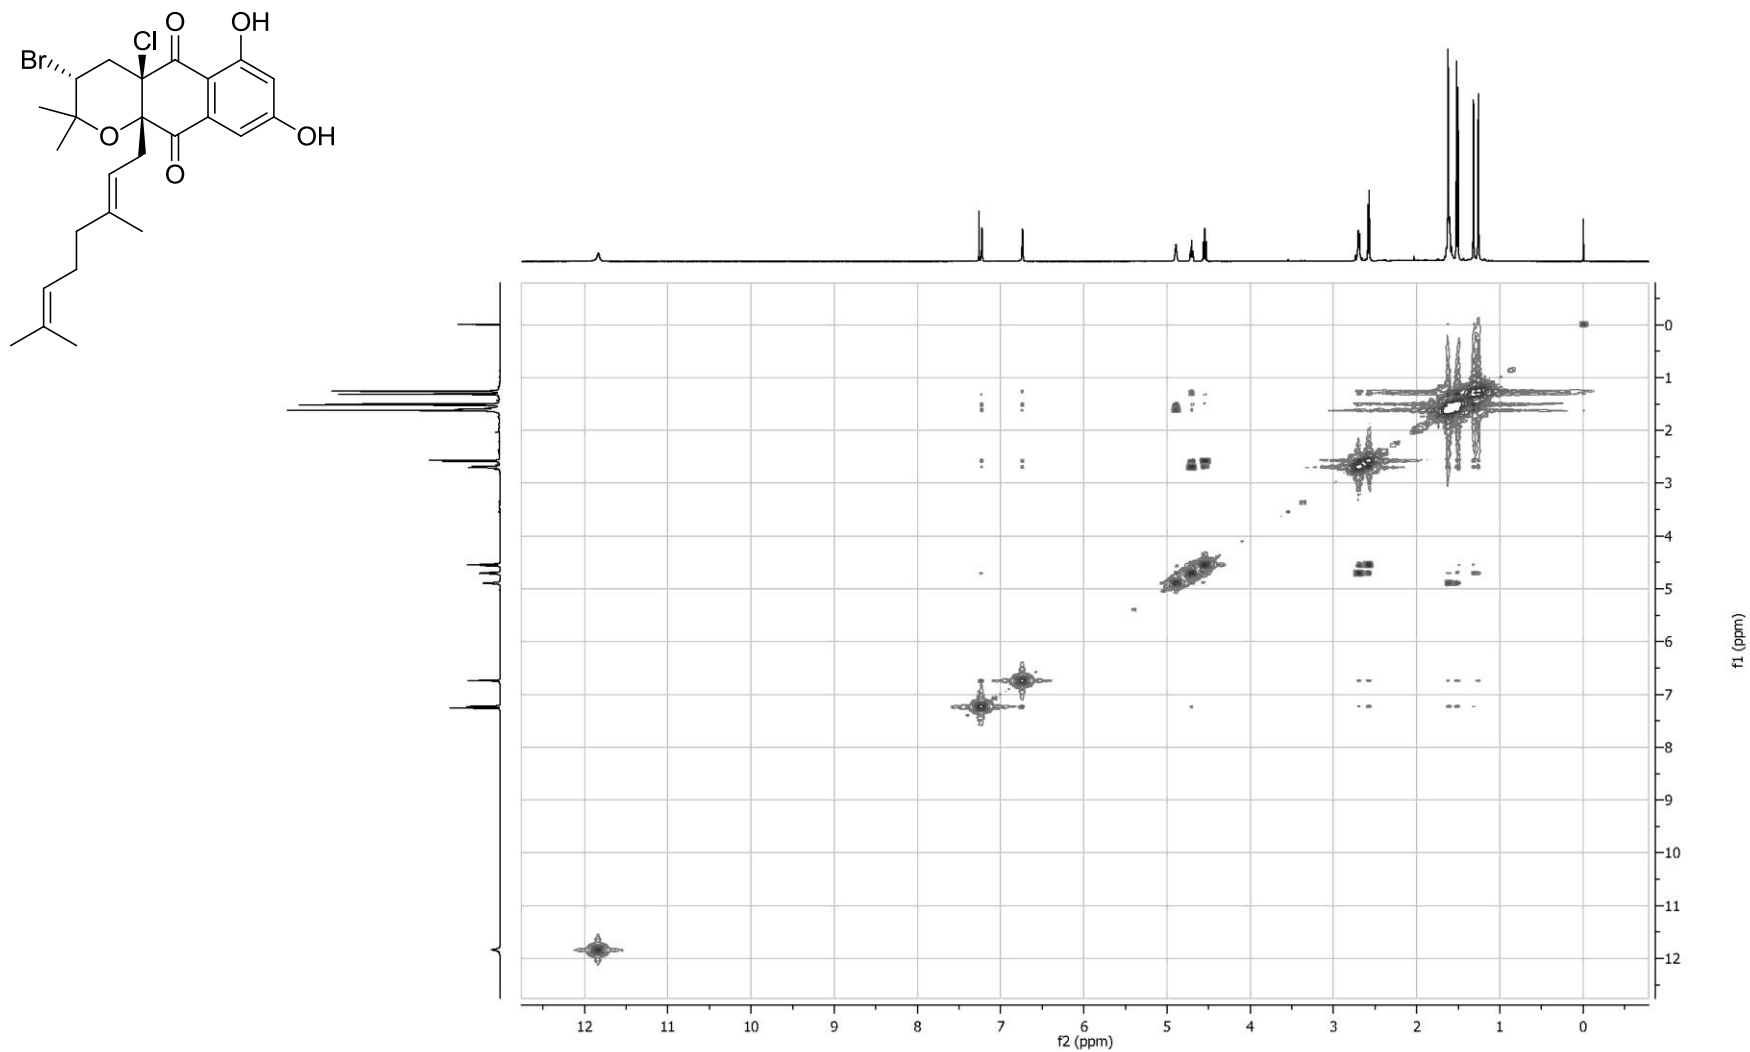

**Figure S4.** Spectral data for compound **3**. (A) HRESIMS (a), IR (b) and UV (c) spectra of compound **3**.

(a). HRESIMS spectrum of compound **3**.

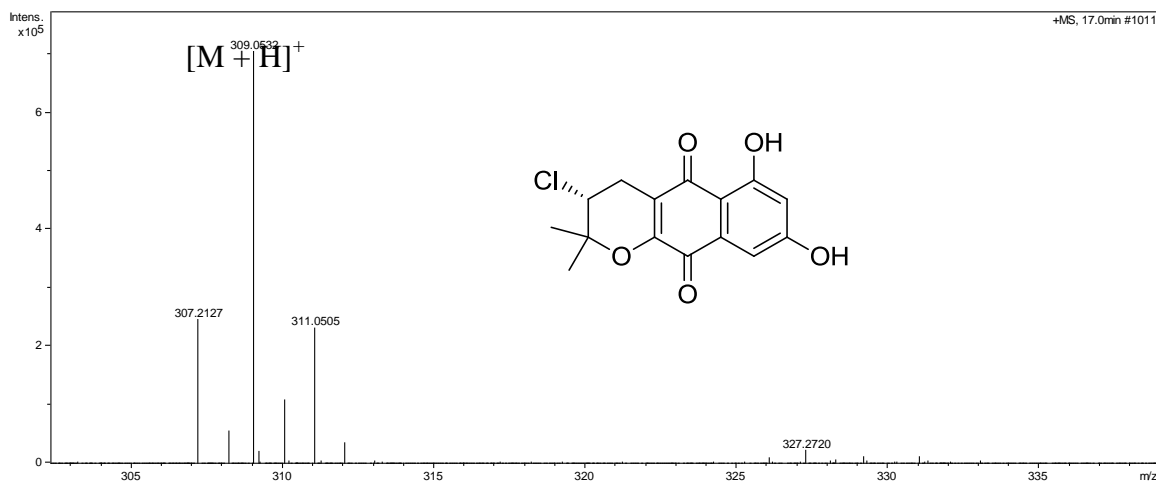

(b). IR spectrum of compound **3**.

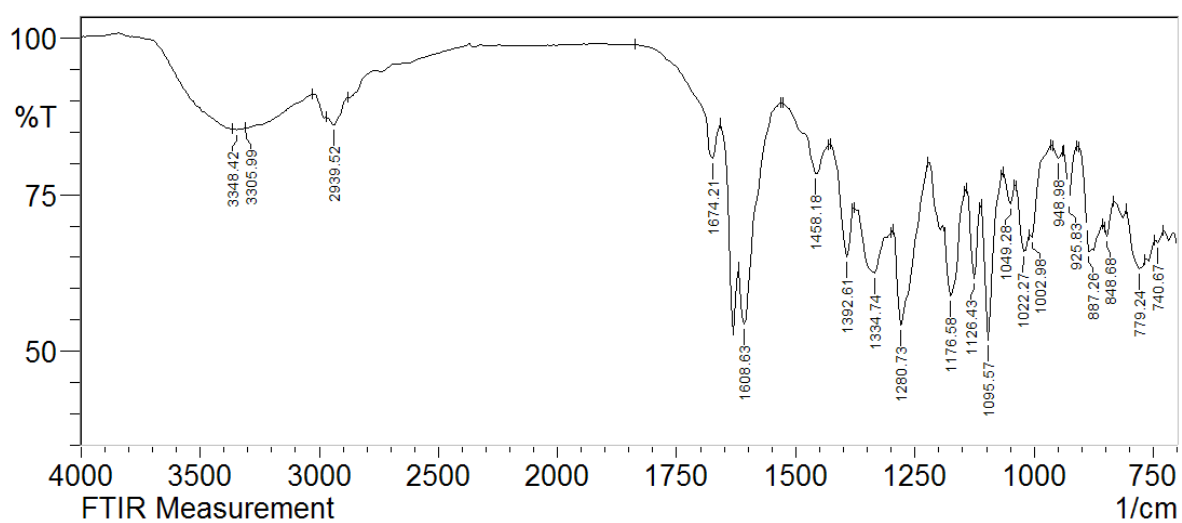

(c). UV spectrum of compound **3**.

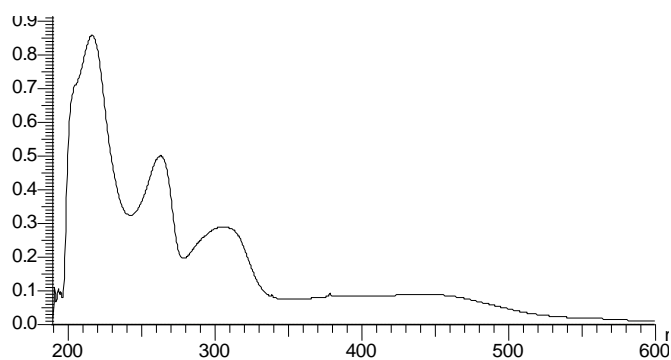

**Figure S4. (B)** The  $^1\text{H}$  NMR spectrum of compound **3** measured in  $\text{CD}_3\text{OD}$ .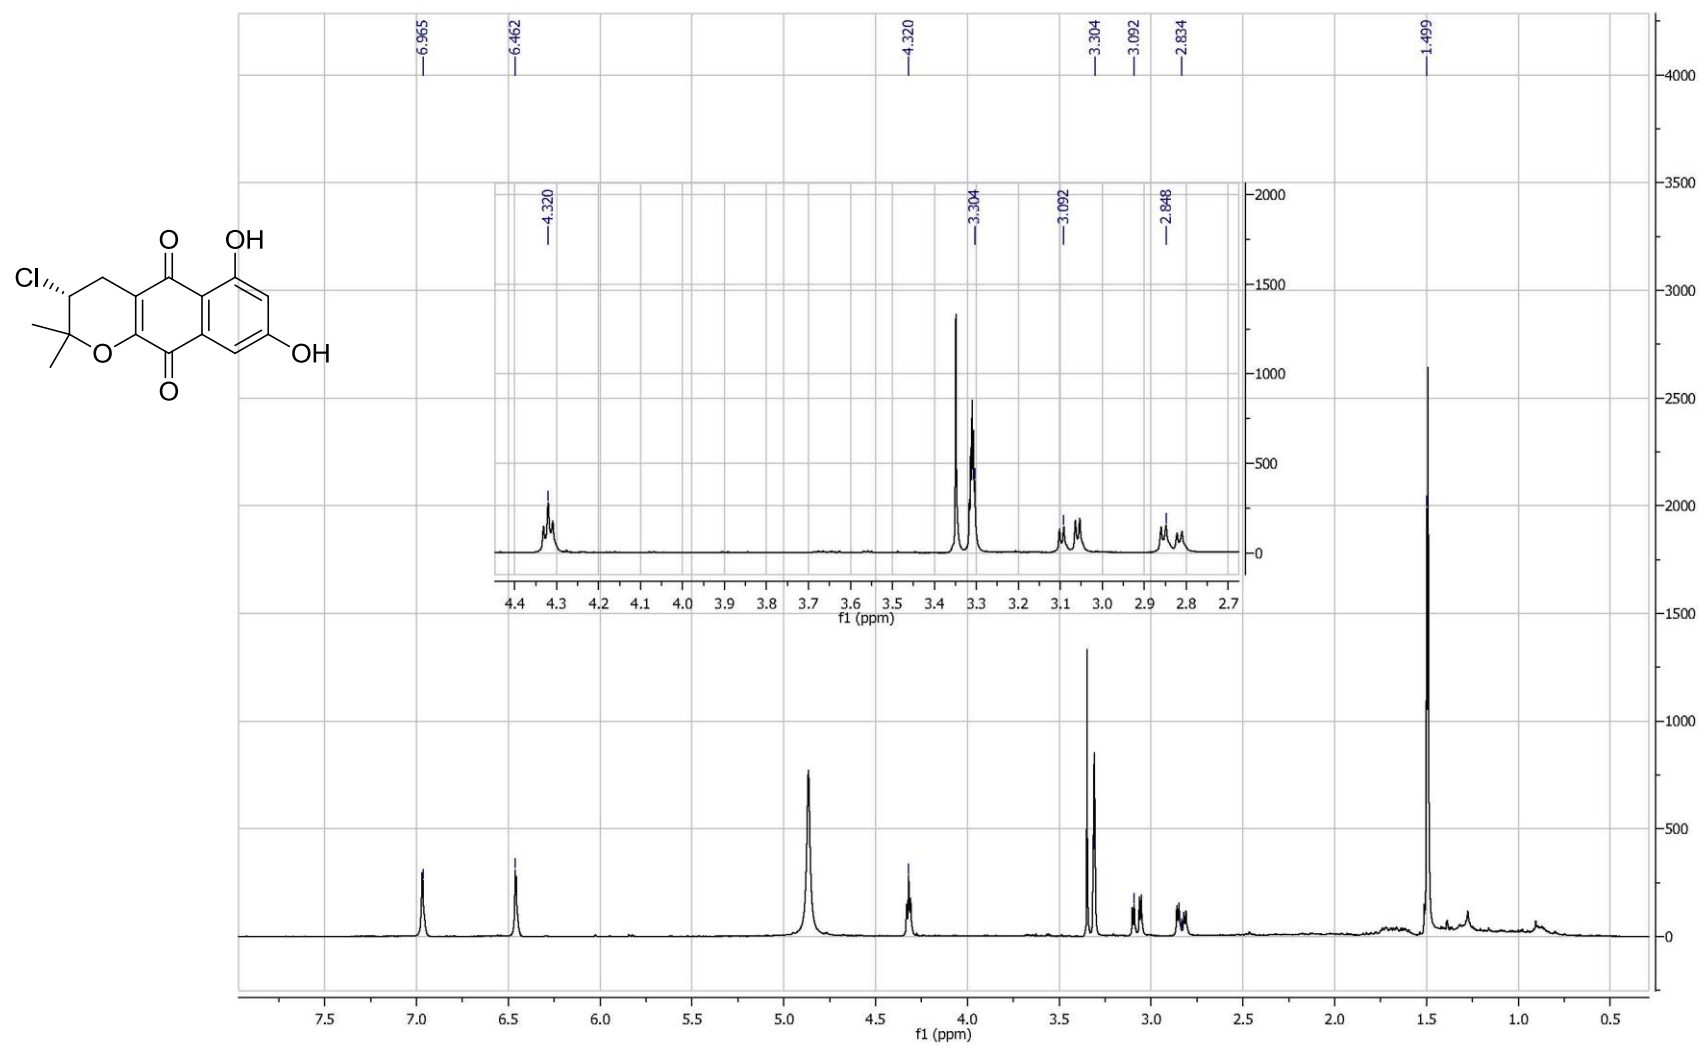

**Figure S4.** (C) The  $^{13}\text{C}$  and the DEPT 135 NMR spectrum of compound **3** measured in  $\text{CD}_3\text{OD}$ .

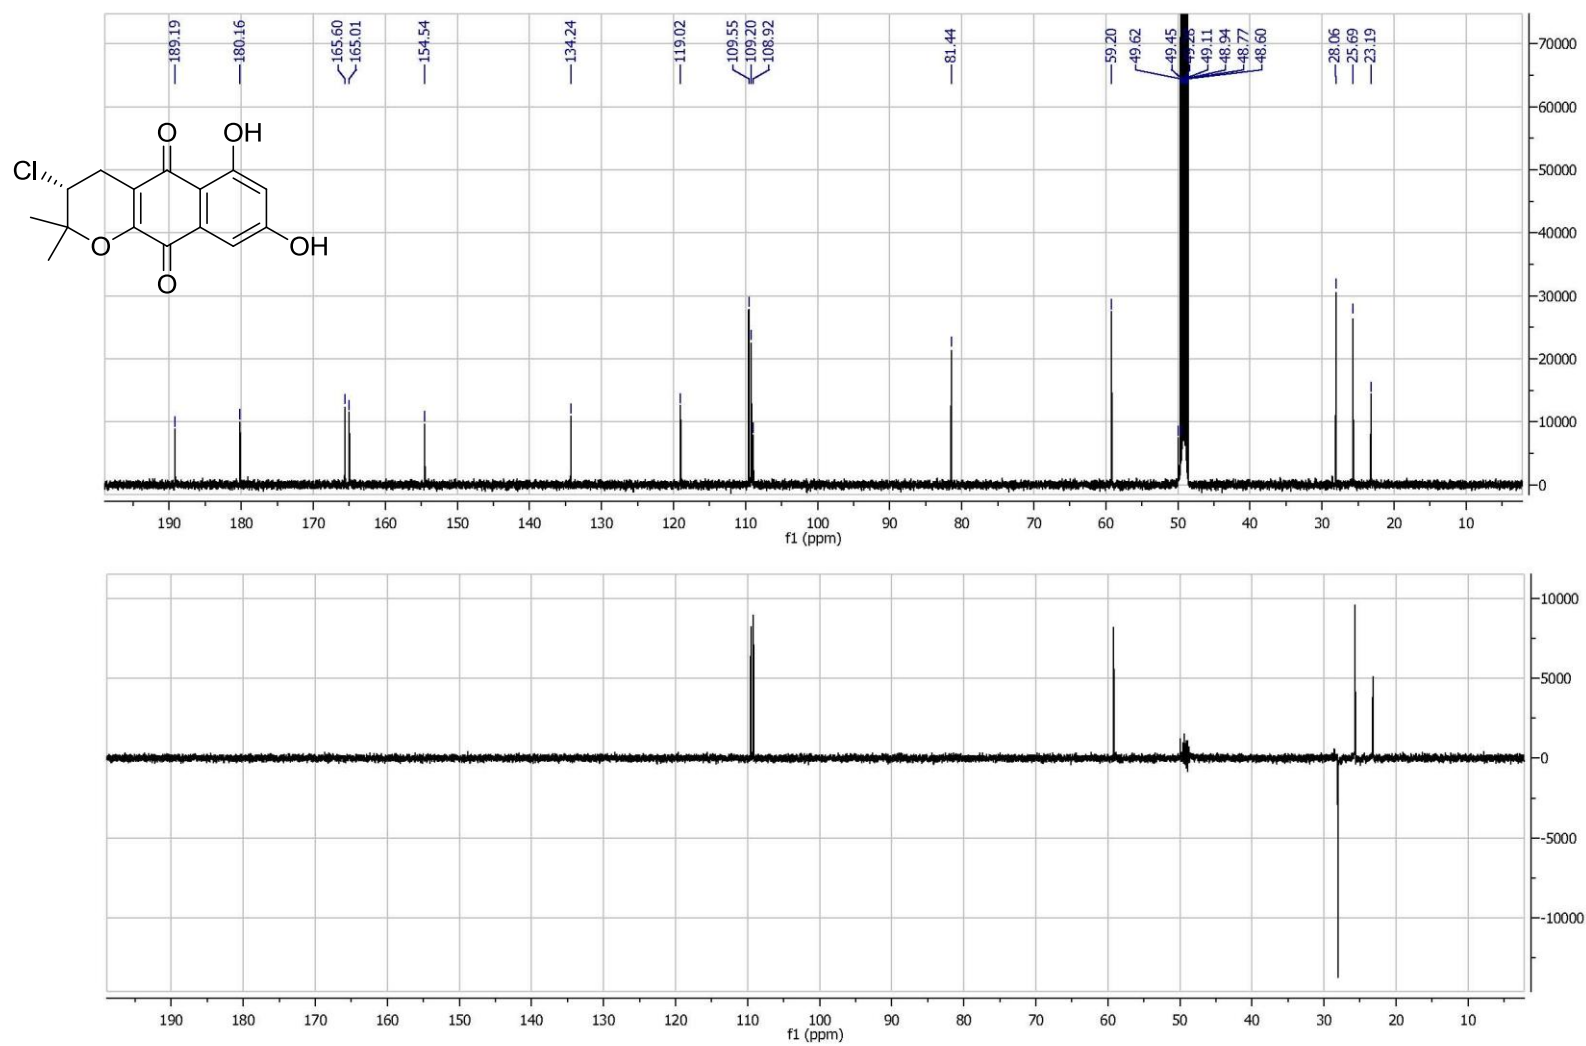

**Figure S4. (D)** The HSQC spectrum of compound **3** measured in CD<sub>3</sub>OD.

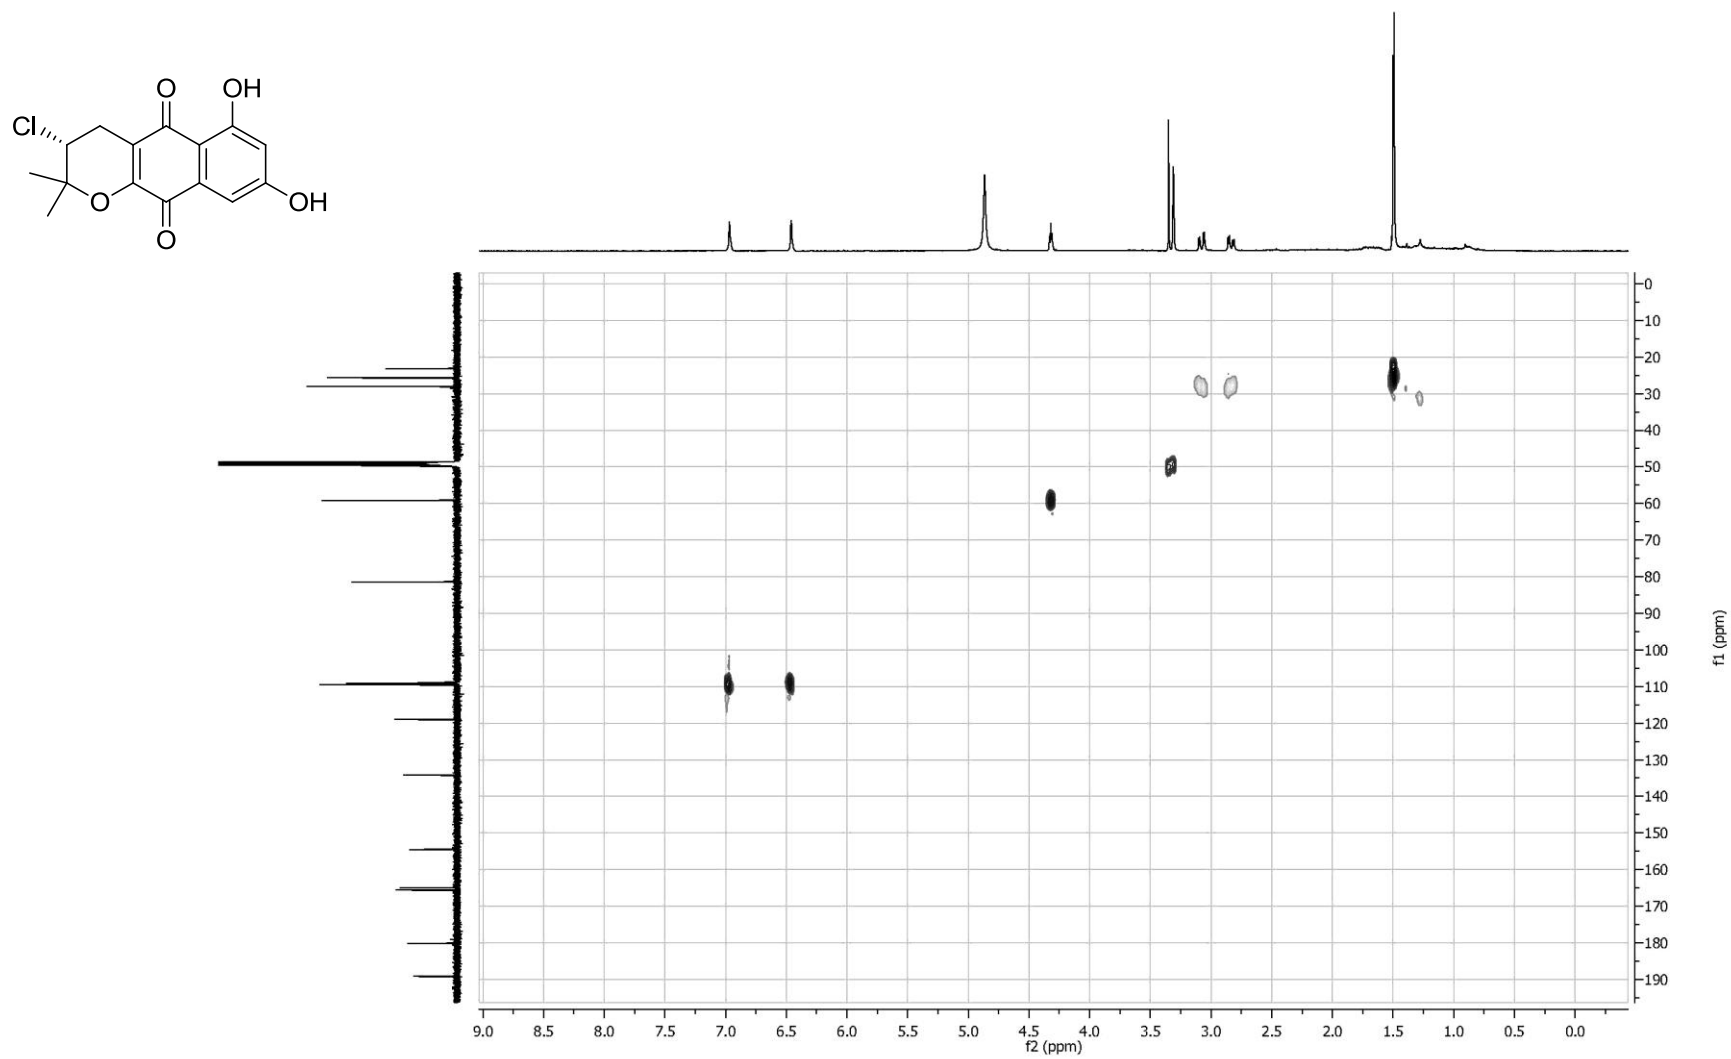

**Figure S4. (E)** The HMBC spectrum of compound **3** measured in CD<sub>3</sub>OD.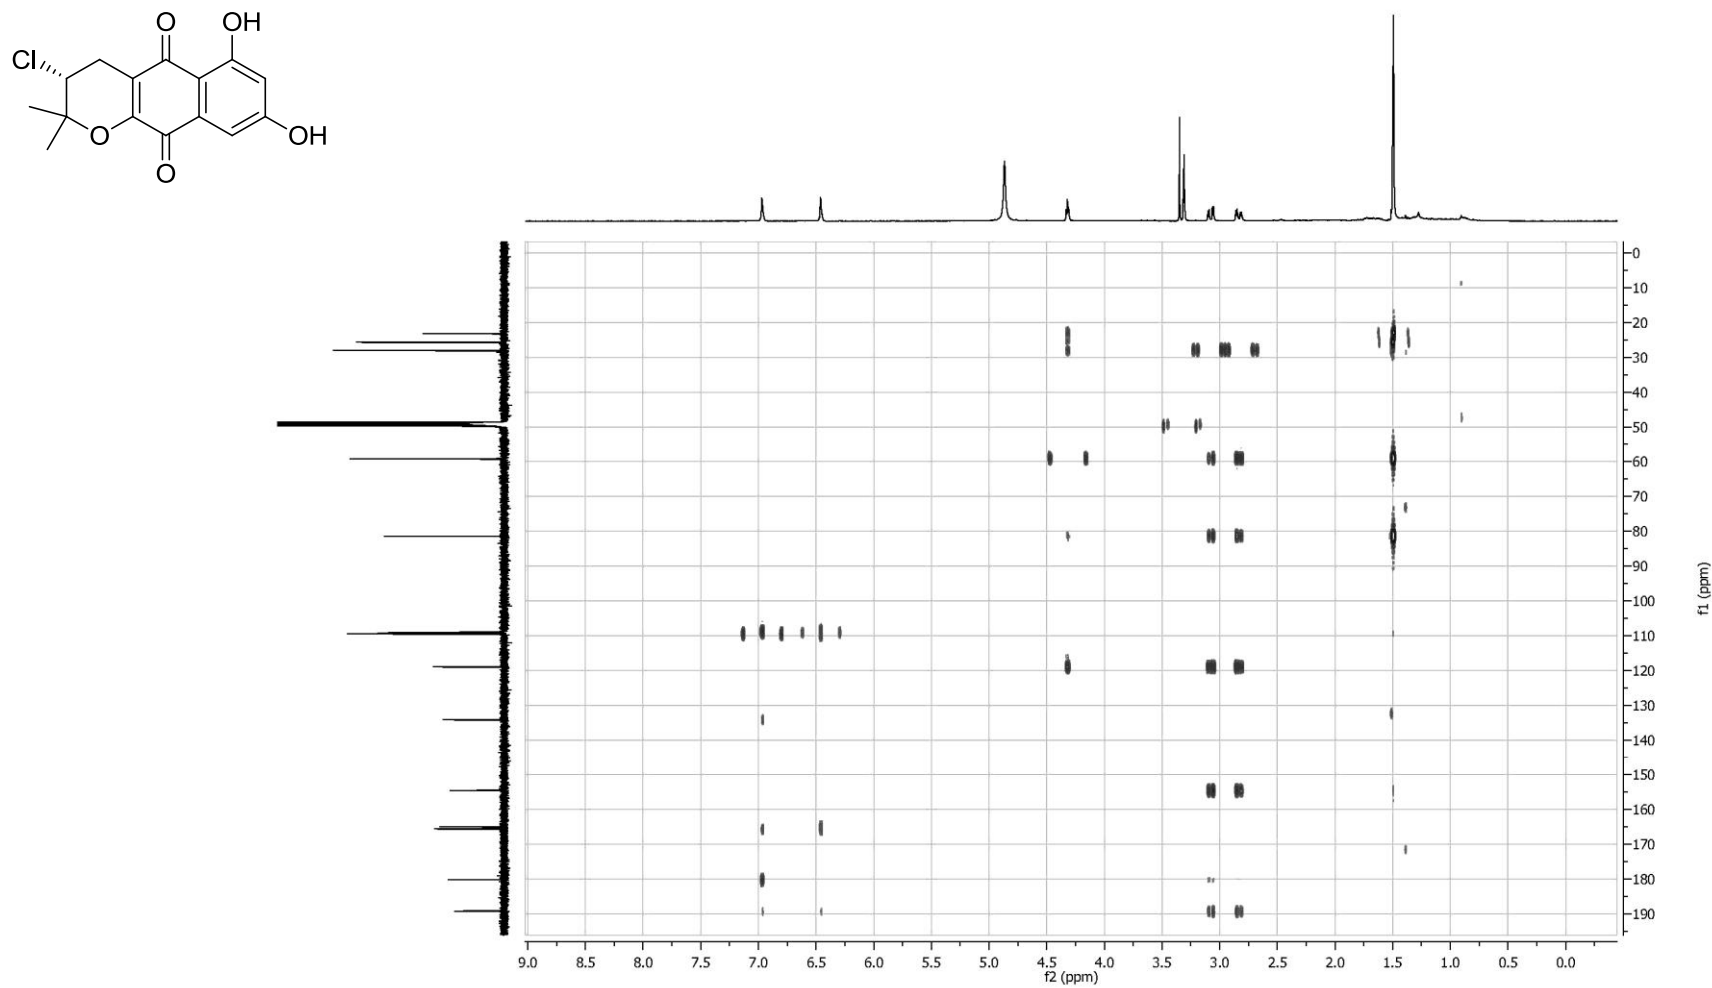

**Figure S4. (F)** The COSY spectrum of compound **3** measured in CD<sub>3</sub>OD.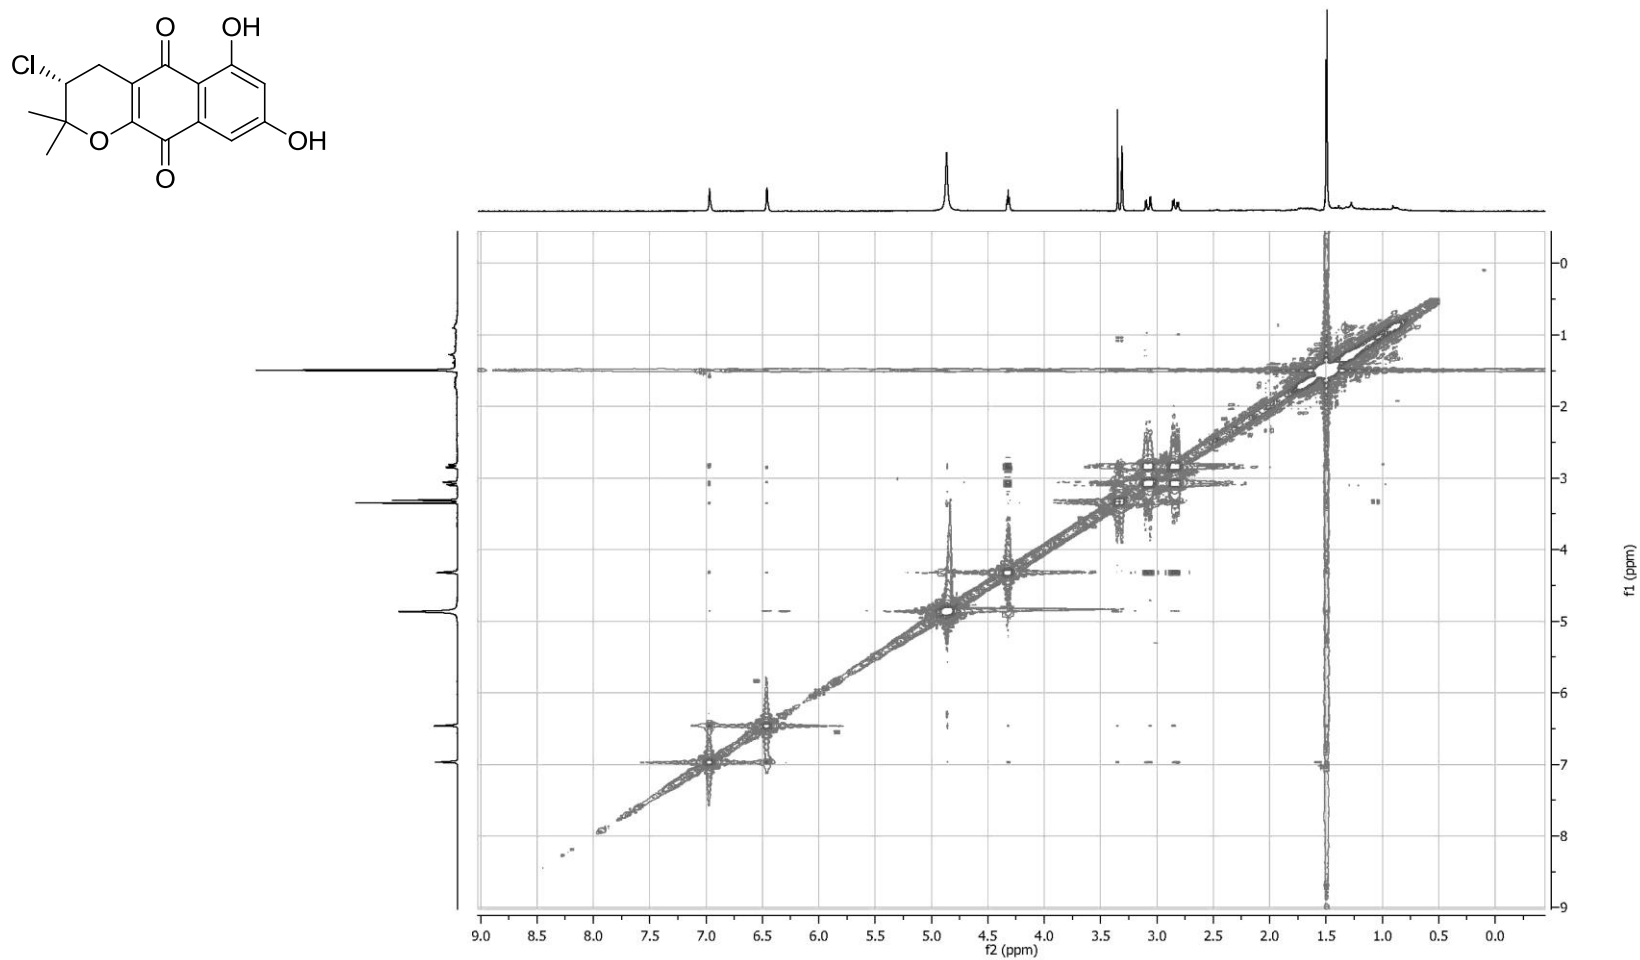

**Figure S5. (A)** The  $^1\text{H}$  NMR spectrum of compound **3** measured in  $\text{CDCl}_3$ .

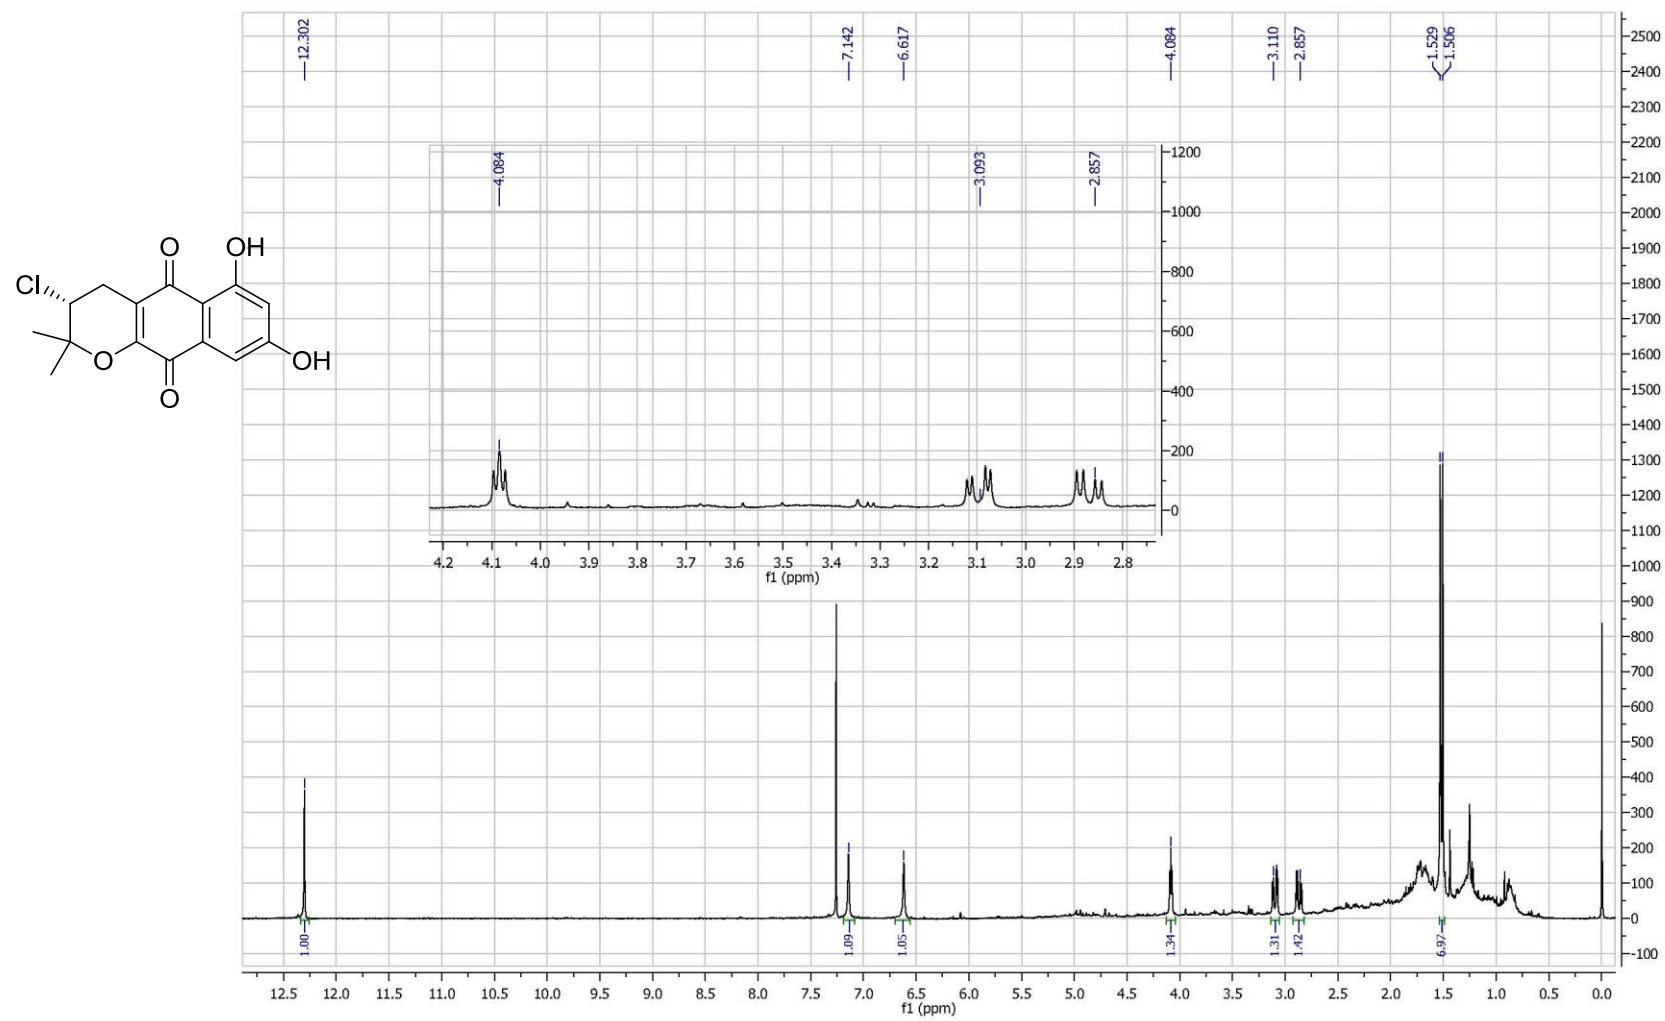



**Figure S5. (B)** The  $^{13}\text{C}$  and the DEPT 135 NMR spectrum of compound **3** measured in  $\text{CDCl}_3$ .

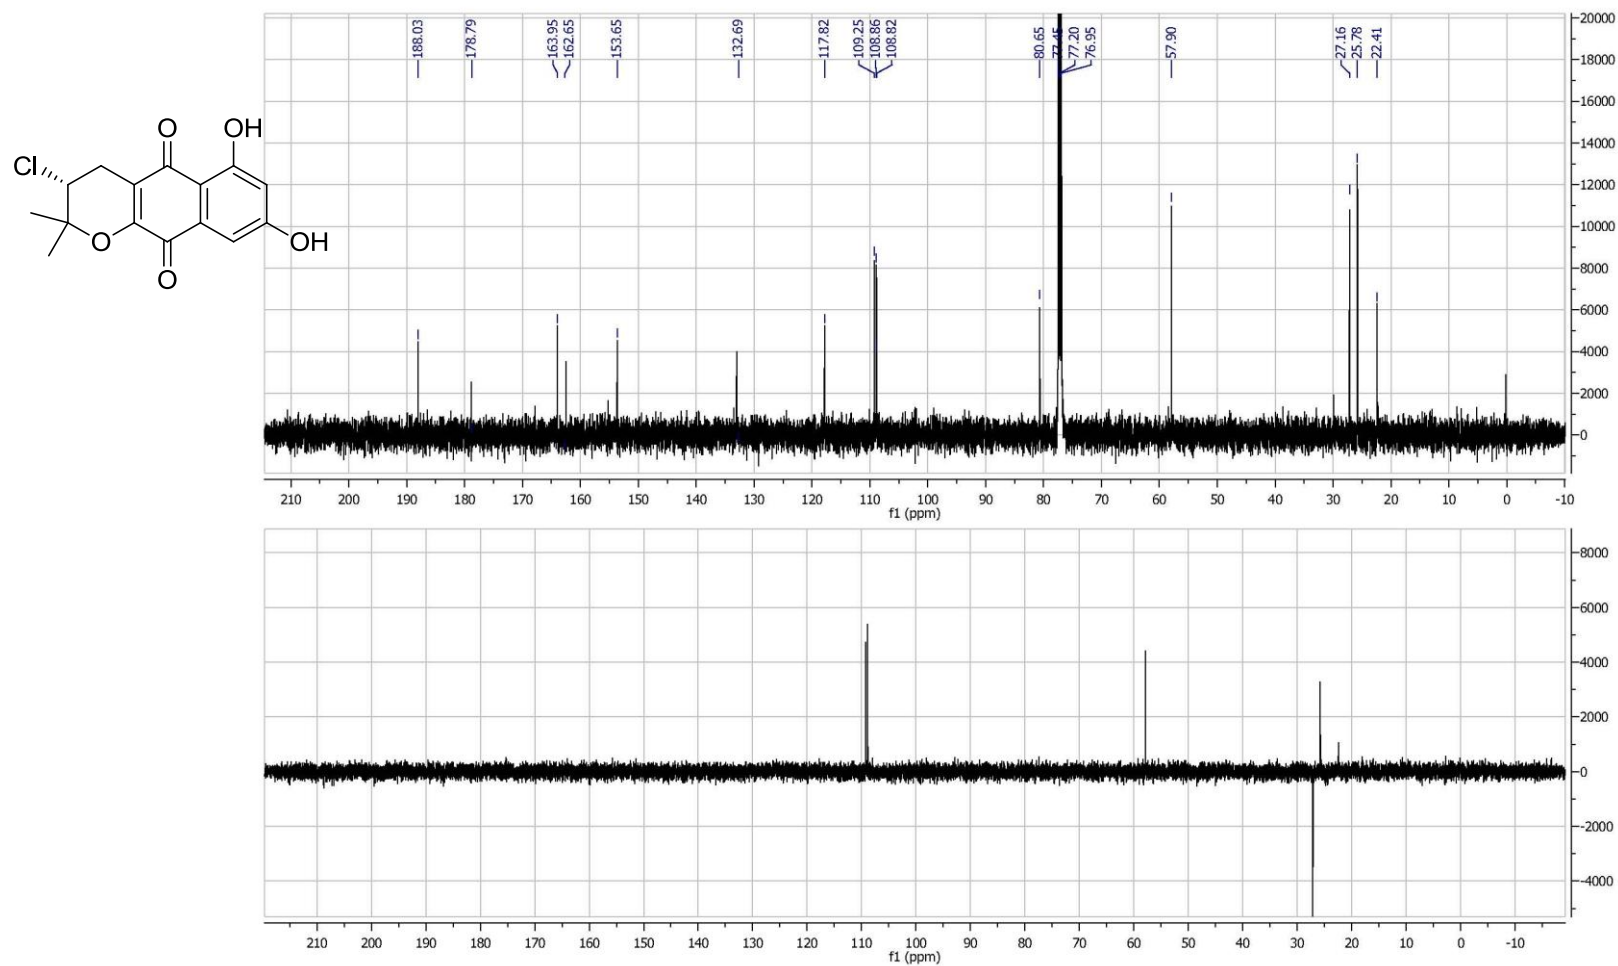

**Figure S5.** (C) The HMBC spectrum of compound **3** measured in  $\text{CDCl}_3$ .

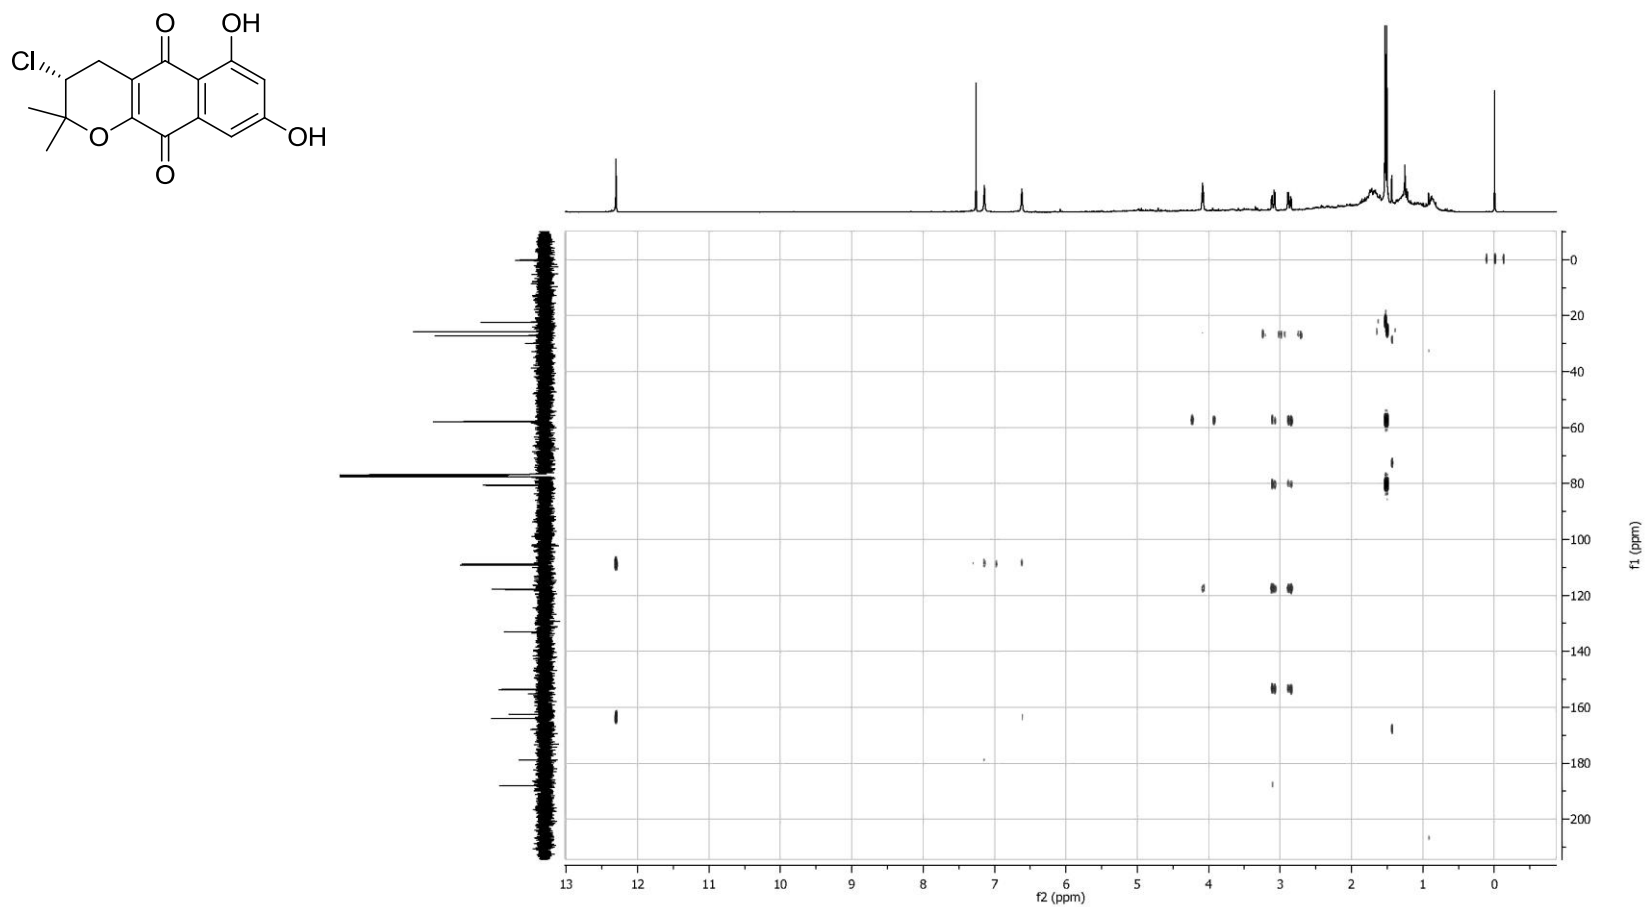

## References

1. Shiomi, K.; Iinuma, H.; Hamada, M.; Naganawa, H.; Manabe, M.; Matsuki, C.; Takeuchi, T.; Umezawa, H. Novel antibiotics napyradiomycins. Production, isolation, physicochemical properties and biological activity. *J. Antibiot.* **1986**, *39*, 487–493.
2. Shiomi, K.; Nakamura, H.; Iinuma, H.; Naganawa, H.; Isshiki, K.; Takeuchi, T.; Umezawa, H. Structures of new antibiotics napyradiomycins. *J. Antibiot.* **1986**, *39*, 494–501.
3. Motohashi, K.; Sue, M.; Furihata, K.; Ito, S.; Seto, H. Terpenoids produced by actinomycetes: napyradiomycins from *Streptomyces antimycoticus* NT17. *J. Nat. Prod.* **2008**, *71*, 595–601.
4. Henkel, T.; Zeeck, A. Secondary metabolites by chemical screening. 15. Structure and absolute configuration of naphthomevalin, a new dihydro-naphthoquinone antibiotic from *Streptomyces* sp. *J. Antibiot.* **1991**, *44*, 665–669.

© 2013 by the authors; licensee MDPI, Basel, Switzerland. This article is an open access article distributed under the terms and conditions of the Creative Commons Attribution license (<http://creativecommons.org/licenses/by/3.0/>).
