# Supplementary material for: Antibacterial and Cytotoxic New Napyradiomycins from the Marine-Derived Streptomyces sp. SCSIO 10428
Source: MDPI journal article supplement (doi:10.3390/md11062113), 2013-06-14
Supplement: s2 [file s2]

marinedrugs-11-02113-s001.mol
  corina  04141423273D 1   1.00000     0.00000 
CORINA 3.49 0023  12.04.2013
 31 33  0  0  0  0  0  0  0  0999 V2000
    0.2010    3.3879   -0.3231 C   0  0  0  0  0  0  0  0  0  0  0  0
    0.0983    1.9816   -0.3952 C   0  0  0  0  0  0  0  0  0  0  0  0
    1.2439    1.2206   -0.6038 C   0  0  0  0  0  0  0  0  0  0  0  0
    2.4773    1.8473   -0.7470 C   0  0  0  0  0  0  0  0  0  0  0  0
    2.5777    3.2293   -0.6837 C   0  0  0  0  0  0  0  0  0  0  0  0
    1.4461    4.0051   -0.4721 C   0  0  0  0  0  0  0  0  0  0  0  0
   -1.0118    4.2022   -0.0832 C   0  0  0  0  0  0  0  0  0  0  0  0
   -2.3112    3.4931   -0.1939 C   0  0  0  0  0  0  0  0  0  0  0  0
   -2.3582    2.0909    0.3547 C   0  0  0  0  0  0  0  0  0  0  0  0
   -1.2132    1.3171   -0.2587 C   0  0  0  0  0  0  0  0  0  0  0  0
   -3.3513    4.0881   -0.7512 C   0  0  0  0  0  0  0  0  0  0  0  0
   -4.6586    3.3444   -0.8904 C   0  0  0  0  0  0  0  0  0  0  0  0
   -4.3314    1.8507   -1.0218 C   0  0  0  0  0  0  0  0  0  0  0  0
   -3.5925    1.4430    0.1275 O   0  0  0  0  0  0  0  0  0  0  0  0
    3.5921    1.1003   -0.9501 O   0  0  0  0  0  0  0  0  0  0  0  0
   -1.3687    0.1737   -0.6307 O   0  0  0  0  0  0  0  0  0  0  0  0
   -5.6300    1.0464   -1.1092 C   0  0  0  0  0  0  0  0  0  0  0  0
   -3.4933    1.6174   -2.2804 C   0  0  0  0  0  0  0  0  0  0  0  0
   -2.1352    2.1591    1.8668 C   0  0  0  0  0  0  0  0  0  0  0  0
   -2.0546    0.7620    2.4262 C   0  0  0  0  0  0  0  0  0  0  0  0
   -2.8156    0.4153    3.4345 C   0  0  0  0  0  0  0  0  0  0  0  0
   -3.6613    1.4501    4.1310 C   0  0  0  0  0  0  0  0  0  0  0  0
   -2.8452   -1.0183    3.8981 C   0  0  0  0  0  0  0  0  0  0  0  0
   -1.8582   -1.2015    5.0527 C   0  0  0  0  0  0  0  0  0  0  0  0
   -1.8878   -2.6351    5.5163 C   0  0  0  0  0  0  0  0  0  0  0  0
   -0.8039   -3.3677    5.4493 C   0  0  0  0  0  0  0  0  0  0  0  0
    0.4320   -2.8251    4.7791 C   0  0  0  0  0  0  0  0  0  0  0  0
   -0.7929   -4.7531    6.0423 C   0  0  0  0  0  0  0  0  0  0  0  0
   -5.5310    3.9113   -2.3629 Cl  0  0  0  0  0  0  0  0  0  0  0  0
   -0.9472    5.3862    0.1898 O   0  0  0  0  0  0  0  0  0  0  0  0
    1.5482    5.3562   -0.4111 O   0  0  0  0  0  0  0  0  0  0  0  0
  1  2  2  0      
  2  3  1  0      
  3  4  2  0      
  4  5  1  0      
  5  6  2  0      
  6  1  1  0      
  1  7  1  0      
  7  8  1  0      
  8  9  1  0      
  9 10  1  0      
 10  2  1  0      
  8 11  2  0      
 11 12  1  0      
 12 13  1  0      
 13 14  1  0      
 14  9  1  0      
  4 15  1  0      
 10 16  2  0      
 13 17  1  0      
 13 18  1  0      
  9 19  1  0      
 19 20  1  0      
 20 21  2  0      
 21 22  1  0      
 21 23  1  0      
 23 24  1  0      
 24 25  1  0      
 25 26  2  0      
 26 27  1  0      
 26 28  1  0      
 12 29  1  0      
  7 30  2  0      
  6 31  1  0      
M  END
$$$$
