# Supplementary material for: Antibacterial and Cytotoxic New Napyradiomycins from the Marine-Derived Streptomyces sp. SCSIO 10428
Source: MDPI journal article supplement (doi:10.3390/md11062113), 2013-06-14
Supplement: s3 [file s3]

marinedrugs-11-02113-s001.mol
  ChemDraw02071408422D

 31 33  0  0  0  0  0  0  0  0999 V2000
    1.0717    2.2687    0.0000 C   0  0  0  0  0  0  0  0  0  0  0  0
    1.0717    1.4438    0.0000 C   0  0  0  0  0  0  0  0  0  0  0  0
    1.7862    1.0313    0.0000 C   0  0  0  0  0  0  0  0  0  0  0  0
    2.5006    1.4438    0.0000 C   0  0  0  0  0  0  0  0  0  0  0  0
    2.5006    2.2687    0.0000 C   0  0  0  0  0  0  0  0  0  0  0  0
    1.7862    2.6812    0.0000 C   0  0  0  0  0  0  0  0  0  0  0  0
    0.3572    2.6812    0.0000 C   0  0  0  0  0  0  0  0  0  0  0  0
   -0.3572    2.2687    0.0000 C   0  0  0  0  0  0  0  0  0  0  0  0
   -0.3572    1.4438    0.0000 C   0  0  0  0  0  0  0  0  0  0  0  0
    0.3572    1.0313    0.0000 C   0  0  0  0  0  0  0  0  0  0  0  0
   -1.0717    2.6812    0.0000 C   0  0  0  0  0  0  0  0  0  0  0  0
   -1.7862    2.2687    0.0000 C   0  0  0  0  0  0  0  0  0  0  0  0
   -1.7862    1.4438    0.0000 C   0  0  0  0  0  0  0  0  0  0  0  0
   -1.0717    1.0313    0.0000 O   0  0  0  0  0  0  0  0  0  0  0  0
    3.2151    1.0313    0.0000 O   0  0  0  0  0  0  0  0  0  0  0  0
    0.3572    0.2062    0.0000 O   0  0  0  0  0  0  0  0  0  0  0  0
   -2.5831    1.6573    0.0000 C   0  0  0  0  0  0  0  0  0  0  0  0
   -2.1987    0.7293    0.0000 C   0  0  0  0  0  0  0  0  0  0  0  0
   -0.3572    0.6188    0.0000 C   0  0  0  0  0  0  0  0  0  0  0  0
   -1.0717    0.2062    0.0000 C   0  0  0  0  0  0  0  0  0  0  0  0
   -1.0717   -0.6188    0.0000 C   0  0  0  0  0  0  0  0  0  0  0  0
   -0.3572   -1.0313    0.0000 C   0  0  0  0  0  0  0  0  0  0  0  0
   -1.7862   -1.0313    0.0000 C   0  0  0  0  0  0  0  0  0  0  0  0
   -1.7862   -1.8563    0.0000 C   0  0  0  0  0  0  0  0  0  0  0  0
   -2.5006   -2.2687    0.0000 C   0  0  0  0  0  0  0  0  0  0  0  0
   -2.5006   -3.0938    0.0000 C   0  0  0  0  0  0  0  0  0  0  0  0
   -1.7862   -3.5063    0.0000 C   0  0  0  0  0  0  0  0  0  0  0  0
   -3.2151   -3.5063    0.0000 C   0  0  0  0  0  0  0  0  0  0  0  0
   -2.5006    2.6812    0.0000 Cl  0  0  0  0  0  0  0  0  0  0  0  0
    0.3572    3.5063    0.0000 O   0  0  0  0  0  0  0  0  0  0  0  0
    1.7862    3.5063    0.0000 O   0  0  0  0  0  0  0  0  0  0  0  0
  1  2  2  0      
  2  3  1  0      
  3  4  2  0      
  4  5  1  0      
  5  6  2  0      
  6  1  1  0      
  1  7  1  0      
  7  8  1  0      
  8  9  1  0      
  9 10  1  0      
 10  2  1  0      
  8 11  2  0      
 11 12  1  0      
 12 13  1  0      
 13 14  1  0      
 14  9  1  0      
  4 15  1  0      
 10 16  2  0      
 13 17  1  0      
 13 18  1  0      
  9 19  1  1      
 19 20  1  0      
 20 21  2  0      
 21 22  1  0      
 21 23  1  0      
 23 24  1  0      
 24 25  1  0      
 25 26  2  0      
 26 27  1  0      
 26 28  1  0      
 12 29  1  6      
  7 30  2  0      
  6 31  1  0      
M  END
