# Supplementary material for: Antibacterial and Cytotoxic New Napyradiomycins from the Marine-Derived Streptomyces sp. SCSIO 10428
Source: MDPI journal article supplement (doi:10.3390/md11062113), 2013-06-14
Supplement: s4 [file s4]

marinedrugs-11-02113-s002.mol
  corina  04141423273D 1   1.00000     0.00000 
CORINA 3.49 0023  12.04.2013
 32 34  0  0  0  0  0  0  0  0999 V2000
    1.5986    2.0179   -0.0038 C   0  0  0  0  0  0  0  0  0  0  0  0
    1.4467    0.6345   -0.2518 C   0  0  0  0  0  0  0  0  0  0  0  0
    2.5718   -0.1696   -0.3761 C   0  0  0  0  0  0  0  0  0  0  0  0
    3.8412    0.3931   -0.2709 C   0  0  0  0  0  0  0  0  0  0  0  0
    3.9929    1.7520   -0.0423 C   0  0  0  0  0  0  0  0  0  0  0  0
    2.8790    2.5717    0.0922 C   0  0  0  0  0  0  0  0  0  0  0  0
    0.3956    2.8429    0.1536 C   0  0  0  0  0  0  0  0  0  0  0  0
   -0.9026    2.3454   -0.4364 C   0  0  0  0  0  0  0  0  0  0  0  0
   -1.1182    0.8785   -0.0421 C   0  0  0  0  0  0  0  0  0  0  0  0
    0.0961    0.0544   -0.3905 C   0  0  0  0  0  0  0  0  0  0  0  0
   -0.8595    2.4554   -1.9610 C   0  0  0  0  0  0  0  0  0  0  0  0
   -2.2240    2.0136   -2.4990 C   0  0  0  0  0  0  0  0  0  0  0  0
   -2.5037    0.5709   -2.0685 C   0  0  0  0  0  0  0  0  0  0  0  0
   -2.2807    0.3747   -0.6846 O   0  0  0  0  0  0  0  0  0  0  0  0
    4.9390   -0.3952   -0.3935 O   0  0  0  0  0  0  0  0  0  0  0  0
   -0.0157   -1.1047   -0.7421 O   0  0  0  0  0  0  0  0  0  0  0  0
   -3.9968    0.2885   -2.3490 C   0  0  0  0  0  0  0  0  0  0  0  0
   -1.6862   -0.3900   -2.9312 C   0  0  0  0  0  0  0  0  0  0  0  0
   -1.3368    0.8104    1.4811 C   0  0  0  0  0  0  0  0  0  0  0  0
   -1.4289   -0.6309    1.9114 C   0  0  0  0  0  0  0  0  0  0  0  0
   -0.5951   -1.1022    2.8052 C   0  0  0  0  0  0  0  0  0  0  0  0
    0.5384   -0.2439    3.3047 C   0  0  0  0  0  0  0  0  0  0  0  0
   -0.7694   -2.5026    3.3338 C   0  0  0  0  0  0  0  0  0  0  0  0
    0.1150   -3.4627    2.5358 C   0  0  0  0  0  0  0  0  0  0  0  0
   -0.0593   -4.8632    3.0644 C   0  0  0  0  0  0  0  0  0  0  0  0
   -0.4774   -5.8162    2.2688 C   0  0  0  0  0  0  0  0  0  0  0  0
   -0.9201   -5.4871    0.8664 C   0  0  0  0  0  0  0  0  0  0  0  0
   -0.5157   -7.2418    2.7561 C   0  0  0  0  0  0  0  0  0  0  0  0
   -2.2184    2.1201   -4.4628 Br  0  0  0  0  0  0  0  0  0  0  0  0
    0.4369    3.9004    0.7475 O   0  0  0  0  0  0  0  0  0  0  0  0
    3.0419    3.8997    0.3114 O   0  0  0  0  0  0  0  0  0  0  0  0
   -2.2679    3.3419    0.1999 Cl  0  0  0  0  0  0  0  0  0  0  0  0
  1  2  2  0      
  2  3  1  0      
  3  4  2  0      
  4  5  1  0      
  5  6  2  0      
  6  1  1  0      
  1  7  1  0      
  7  8  1  0      
  8  9  1  0      
  9 10  1  0      
 10  2  1  0      
  8 11  1  0      
 11 12  1  0      
 12 13  1  0      
 13 14  1  0      
 14  9  1  0      
  4 15  1  0      
 10 16  2  0      
 13 17  1  0      
 13 18  1  0      
  9 19  1  0      
 19 20  1  0      
 20 21  2  0      
 21 22  1  0      
 21 23  1  0      
 23 24  1  0      
 24 25  1  0      
 25 26  2  0      
 26 27  1  0      
 26 28  1  0      
 12 29  1  0      
  7 30  2  0      
  6 31  1  0      
  8 32  1  0      
M  END
$$$$
