# Supplementary material for: Antibacterial and Cytotoxic New Napyradiomycins from the Marine-Derived Streptomyces sp. SCSIO 10428
Source: MDPI journal article supplement (doi:10.3390/md11062113), 2013-06-14
Supplement: s6 [file s6]

marinedrugs-11-02113-s003.mol
  corina  04141423273D 1   1.00000     0.00000 
CORINA 3.49 0023  12.04.2013
 34 37  0  0  0  0  0  0  0  0999 V2000
    0.5744    1.2041    0.3370 C   0  0  0  0  0  0  0  0  0  0  0  0
    0.6783   -0.1887    0.5559 C   0  0  0  0  0  0  0  0  0  0  0  0
    1.8802   -0.7285    0.9934 C   0  0  0  0  0  0  0  0  0  0  0  0
    2.9789    0.1017    1.2001 C   0  0  0  0  0  0  0  0  0  0  0  0
    2.8839    1.4657    0.9713 C   0  0  0  0  0  0  0  0  0  0  0  0
    1.6876    2.0256    0.5394 C   0  0  0  0  0  0  0  0  0  0  0  0
   -0.7144    1.7562   -0.0954 C   0  0  0  0  0  0  0  0  0  0  0  0
   -1.7049    0.8354   -0.7675 C   0  0  0  0  0  0  0  0  0  0  0  0
   -1.8421   -0.4566    0.0484 C   0  0  0  0  0  0  0  0  0  0  0  0
   -0.4855   -1.0629    0.3070 C   0  0  0  0  0  0  0  0  0  0  0  0
   -1.2250    0.4908   -2.1780 C   0  0  0  0  0  0  0  0  0  0  0  0
   -2.3013   -0.3766   -2.8378 C   0  0  0  0  0  0  0  0  0  0  0  0
   -2.5136   -1.6491   -2.0126 C   0  0  0  0  0  0  0  0  0  0  0  0
   -2.6886   -1.3689   -0.6363 O   0  0  0  0  0  0  0  0  0  0  0  0
    4.1521   -0.4286    1.6290 O   0  0  0  0  0  0  0  0  0  0  0  0
   -0.3399   -2.2693    0.3610 O   0  0  0  0  0  0  0  0  0  0  0  0
   -3.8086   -2.3187   -2.5249 C   0  0  0  0  0  0  0  0  0  0  0  0
   -1.3635   -2.6233   -2.2664 C   0  0  0  0  0  0  0  0  0  0  0  0
   -2.4916   -0.1122    1.4018 C   0  0  0  0  0  0  0  0  0  0  0  0
   -1.7715   -0.8244   -4.5030 Cl  0  0  0  0  0  0  0  0  0  0  0  0
   -0.9841    2.9255    0.0845 O   0  0  0  0  0  0  0  0  0  0  0  0
    1.6105    3.3606    0.3146 O   0  0  0  0  0  0  0  0  0  0  0  0
   -3.3115    1.6551   -0.8625 Cl  0  0  0  0  0  0  0  0  0  0  0  0
   -2.7002   -1.3953    2.2086 C   0  0  0  0  0  0  0  0  0  0  0  0
   -2.7871   -1.0568    3.7005 C   0  0  0  0  0  0  0  0  0  0  0  0
   -3.9954   -2.0545    1.7888 C   0  0  0  0  0  0  0  0  0  0  0  0
   -4.4998   -3.2266    2.6013 C   0  0  0  0  0  0  0  0  0  0  0  0
   -4.5214   -2.8216    4.0790 C   0  0  0  0  0  0  0  0  0  0  0  0
   -3.1356   -2.3204    4.4889 C   0  0  0  0  0  0  0  0  0  0  0  0
   -1.4400   -0.5119    4.1794 C   0  0  0  0  0  0  0  0  0  0  0  0
   -3.8725   -0.0016    3.9220 C   0  0  0  0  0  0  0  0  0  0  0  0
   -3.1310   -1.9467    6.2527 Cl  0  0  0  0  0  0  0  0  0  0  0  0
   -4.6633   -1.6212    0.7486 C   0  0  0  0  0  0  0  0  0  0  0  0
   -1.8667   -2.0762    2.0356 H   0  0  0  0  0  0  0  0  0  0  0  0
  1  2  2  0      
  2  3  1  0      
  3  4  2  0      
  4  5  1  0      
  5  6  2  0      
  6  1  1  0      
  1  7  1  0      
  7  8  1  0      
  8  9  1  0      
  9 10  1  0      
 10  2  1  0      
  8 11  1  0      
 11 12  1  0      
 12 13  1  0      
 13 14  1  0      
 14  9  1  0      
  4 15  1  0      
 10 16  2  0      
 13 17  1  0      
 13 18  1  0      
  9 19  1  0      
 12 20  1  0      
  7 21  2  0      
  6 22  1  0      
  8 23  1  0      
 19 24  1  0      
 24 25  1  0      
 24 26  1  0      
 26 27  1  0      
 27 28  1  0      
 28 29  1  0      
 29 25  1  0      
 25 30  1  0      
 25 31  1  0      
 29 32  1  0      
 26 33  2  0      
 24 34  1  0      
M  END
$$$$
