# Supplementary material for: Antibacterial and Cytotoxic New Napyradiomycins from the Marine-Derived Streptomyces sp. SCSIO 10428
Source: MDPI journal article supplement (doi:10.3390/md11062113), 2013-06-14
Supplement: s7 [file s7]

marinedrugs-11-02113-s003.mol
  ChemDraw02071408432D

 34 37  0  0  0  0  0  0  0  0999 V2000
    0.7557    1.2375    0.0000 C   0  0  0  0  0  0  0  0  0  0  0  0
    0.7557    0.4125    0.0000 C   0  0  0  0  0  0  0  0  0  0  0  0
    1.4702    0.0000    0.0000 C   0  0  0  0  0  0  0  0  0  0  0  0
    2.1846    0.4125    0.0000 C   0  0  0  0  0  0  0  0  0  0  0  0
    2.1846    1.2375    0.0000 C   0  0  0  0  0  0  0  0  0  0  0  0
    1.4702    1.6500    0.0000 C   0  0  0  0  0  0  0  0  0  0  0  0
    0.0412    1.6500    0.0000 C   0  0  0  0  0  0  0  0  0  0  0  0
   -0.6733    1.2375    0.0000 C   0  0  0  0  0  0  0  0  0  0  0  0
   -0.6733    0.4125    0.0000 C   0  0  0  0  0  0  0  0  0  0  0  0
    0.0412    0.0000    0.0000 C   0  0  0  0  0  0  0  0  0  0  0  0
   -1.3877    1.6500    0.0000 C   0  0  0  0  0  0  0  0  0  0  0  0
   -2.1022    1.2375    0.0000 C   0  0  0  0  0  0  0  0  0  0  0  0
   -2.1022    0.4125    0.0000 C   0  0  0  0  0  0  0  0  0  0  0  0
   -1.3877    0.0000    0.0000 O   0  0  0  0  0  0  0  0  0  0  0  0
    2.8991    0.0000    0.0000 O   0  0  0  0  0  0  0  0  0  0  0  0
    0.0412   -0.8250    0.0000 O   0  0  0  0  0  0  0  0  0  0  0  0
   -2.8991    0.6260    0.0000 C   0  0  0  0  0  0  0  0  0  0  0  0
   -2.5147   -0.3020    0.0000 C   0  0  0  0  0  0  0  0  0  0  0  0
   -0.6733   -0.4125    0.0000 C   0  0  0  0  0  0  0  0  0  0  0  0
   -2.8167    1.6500    0.0000 Cl  0  0  0  0  0  0  0  0  0  0  0  0
    0.0412    2.4750    0.0000 O   0  0  0  0  0  0  0  0  0  0  0  0
    1.4702    2.4750    0.0000 O   0  0  0  0  0  0  0  0  0  0  0  0
   -0.6733    2.0625    0.0000 Cl  0  0  0  0  0  0  0  0  0  0  0  0
   -1.3877   -0.8250    0.0000 C   0  0  0  0  0  0  0  0  0  0  0  0
   -0.6733   -1.2375    0.0000 C   0  0  0  0  0  0  0  0  0  0  0  0
   -2.1022   -1.2375    0.0000 C   0  0  0  0  0  0  0  0  0  0  0  0
   -2.1022   -2.0625    0.0000 C   0  0  0  0  0  0  0  0  0  0  0  0
   -1.3877   -2.4750    0.0000 C   0  0  0  0  0  0  0  0  0  0  0  0
   -0.6733   -2.0625    0.0000 C   0  0  0  0  0  0  0  0  0  0  0  0
   -0.2608   -0.5230    0.0000 C   0  0  0  0  0  0  0  0  0  0  0  0
    0.0412   -1.6500    0.0000 C   0  0  0  0  0  0  0  0  0  0  0  0
    0.0412   -2.4750    0.0000 Cl  0  0  0  0  0  0  0  0  0  0  0  0
   -2.8167   -0.8250    0.0000 C   0  0  0  0  0  0  0  0  0  0  0  0
   -2.1022   -0.4125    0.0000 H   0  0  0  0  0  0  0  0  0  0  0  0
  1  2  2  0      
  2  3  1  0      
  3  4  2  0      
  4  5  1  0      
  5  6  2  0      
  6  1  1  0      
  1  7  1  0      
  7  8  1  0      
  8  9  1  0      
  9 10  1  0      
 10  2  1  0      
  8 11  1  0      
 11 12  1  0      
 12 13  1  0      
 13 14  1  0      
 14  9  1  0      
  4 15  1  0      
 10 16  2  0      
 13 17  1  0      
 13 18  1  0      
  9 19  1  1      
 12 20  1  6      
  7 21  2  0      
  6 22  1  0      
  8 23  1  1      
 19 24  1  0      
 24 25  1  0      
 24 26  1  0      
 26 27  1  0      
 27 28  1  0      
 28 29  1  0      
 29 25  1  0      
 25 30  1  0      
 25 31  1  0      
 29 32  1  1      
 26 33  2  0      
 24 34  1  6      
M  END
