# Supplementary material for: Antibacterial and Cytotoxic New Napyradiomycins from the Marine-Derived Streptomyces sp. SCSIO 10428
Source: MDPI journal article supplement (doi:10.3390/md11062113), 2013-06-14
Supplement: s8 [file s8]

marinedrugs-11-02113-s004.mol
  corina  04141423273D 1   1.00000     0.00000 
CORINA 3.49 0023  12.04.2013
 21 23  0  0  0  0  0  0  0  0999 V2000
   -0.0170    1.4041    0.0098 C   0  0  0  0  0  0  0  0  0  0  0  0
    0.0021   -0.0041    0.0020 C   0  0  0  0  0  0  0  0  0  0  0  0
    1.2142   -0.6791   -0.0122 C   0  0  0  0  0  0  0  0  0  0  0  0
    2.4101    0.0398   -0.0189 C   0  0  0  0  0  0  0  0  0  0  0  0
    2.3953    1.4237   -0.0115 C   0  0  0  0  0  0  0  0  0  0  0  0
    1.1866    2.1140    0.0021 C   0  0  0  0  0  0  0  0  0  0  0  0
   -1.3094    2.1066    0.0320 C   0  0  0  0  0  0  0  0  0  0  0  0
   -2.5721    1.3497    0.0511 C   0  0  0  0  0  0  0  0  0  0  0  0
   -2.5642    0.0036    0.0372 C   0  0  0  0  0  0  0  0  0  0  0  0
   -1.2772   -0.7400    0.0097 C   0  0  0  0  0  0  0  0  0  0  0  0
   -3.8619    2.1334    0.0947 C   0  0  0  0  0  0  0  0  0  0  0  0
   -5.0291    1.2411   -0.3321 C   0  0  0  0  0  0  0  0  0  0  0  0
   -4.9181   -0.0840    0.4344 C   0  0  0  0  0  0  0  0  0  0  0  0
   -3.7067   -0.7249    0.0361 O   0  0  0  0  0  0  0  0  0  0  0  0
    3.5949   -0.6220   -0.0322 O   0  0  0  0  0  0  0  0  0  0  0  0
   -1.2784   -1.9545    0.0009 O   0  0  0  0  0  0  0  0  0  0  0  0
   -4.8874    0.1902    1.9393 C   0  0  0  0  0  0  0  0  0  0  0  0
   -6.1119   -0.9789    0.0953 C   0  0  0  0  0  0  0  0  0  0  0  0
   -4.9406    0.9286   -2.1056 Cl  0  0  0  0  0  0  0  0  0  0  0  0
   -1.3350    3.3232    0.0350 O   0  0  0  0  0  0  0  0  0  0  0  0
    1.1771    3.4696    0.0088 O   0  0  0  0  0  0  0  0  0  0  0  0
  1  2  2  0      
  2  3  1  0      
  3  4  2  0      
  4  5  1  0      
  5  6  2  0      
  6  1  1  0      
  1  7  1  0      
  7  8  1  0      
  8  9  2  0      
  9 10  1  0      
 10  2  1  0      
  8 11  1  0      
 11 12  1  0      
 12 13  1  0      
 13 14  1  0      
 14  9  1  0      
  4 15  1  0      
 10 16  2  0      
 13 17  1  0      
 13 18  1  0      
 12 19  1  0      
  7 20  2  0      
  6 21  1  0      
M  END
$$$$
