# Supplementary material for: Antibacterial and Cytotoxic New Napyradiomycins from the Marine-Derived Streptomyces sp. SCSIO 10428
Source: MDPI journal article supplement (doi:10.3390/md11062113), 2013-06-14
Supplement: s9 [file s9]

marinedrugs-11-02113-s004.mol
  ChemDraw02071408432D

 21 23  0  0  0  0  0  0  0  0999 V2000
    0.7557    0.4125    0.0000 C   0  0  0  0  0  0  0  0  0  0  0  0
    0.7557   -0.4125    0.0000 C   0  0  0  0  0  0  0  0  0  0  0  0
    1.4702   -0.8250    0.0000 C   0  0  0  0  0  0  0  0  0  0  0  0
    2.1846   -0.4125    0.0000 C   0  0  0  0  0  0  0  0  0  0  0  0
    2.1846    0.4125    0.0000 C   0  0  0  0  0  0  0  0  0  0  0  0
    1.4702    0.8250    0.0000 C   0  0  0  0  0  0  0  0  0  0  0  0
    0.0412    0.8250    0.0000 C   0  0  0  0  0  0  0  0  0  0  0  0
   -0.6733    0.4125    0.0000 C   0  0  0  0  0  0  0  0  0  0  0  0
   -0.6733   -0.4125    0.0000 C   0  0  0  0  0  0  0  0  0  0  0  0
    0.0412   -0.8250    0.0000 C   0  0  0  0  0  0  0  0  0  0  0  0
   -1.3877    0.8250    0.0000 C   0  0  0  0  0  0  0  0  0  0  0  0
   -2.1022    0.4125    0.0000 C   0  0  0  0  0  0  0  0  0  0  0  0
   -2.1022   -0.4125    0.0000 C   0  0  0  0  0  0  0  0  0  0  0  0
   -1.3877   -0.8250    0.0000 O   0  0  0  0  0  0  0  0  0  0  0  0
    2.8991   -0.8250    0.0000 O   0  0  0  0  0  0  0  0  0  0  0  0
    0.0412   -1.6500    0.0000 O   0  0  0  0  0  0  0  0  0  0  0  0
   -2.8991   -0.1990    0.0000 C   0  0  0  0  0  0  0  0  0  0  0  0
   -2.5147   -1.1270    0.0000 C   0  0  0  0  0  0  0  0  0  0  0  0
   -2.8167    0.8250    0.0000 Cl  0  0  0  0  0  0  0  0  0  0  0  0
    0.0412    1.6500    0.0000 O   0  0  0  0  0  0  0  0  0  0  0  0
    1.4702    1.6500    0.0000 O   0  0  0  0  0  0  0  0  0  0  0  0
  1  2  2  0      
  2  3  1  0      
  3  4  2  0      
  4  5  1  0      
  5  6  2  0      
  6  1  1  0      
  1  7  1  0      
  7  8  1  0      
  8  9  2  0      
  9 10  1  0      
 10  2  1  0      
  8 11  1  0      
 11 12  1  0      
 12 13  1  0      
 13 14  1  0      
 14  9  1  0      
  4 15  1  0      
 10 16  2  0      
 13 17  1  0      
 13 18  1  0      
 12 19  1  6      
  7 20  2  0      
  6 21  1  0      
M  END
