# Supplementary material for: Antibacterial and Cytotoxic New Napyradiomycins from the Marine-Derived Streptomyces sp. SCSIO 10428
Source: MDPI journal article supplement (doi:10.3390/md11062113), 2013-06-14
Supplement: s10 [file s10]

marinedrugs-11-02113-s005.mol
  corina  04141423273D 1   1.00000     0.00000 
CORINA 3.49 0023  12.04.2013
 31 32  0  0  0  0  0  0  0  0999 V2000
    1.0200    2.1426    1.4603 C   0  0  0  0  0  0  0  0  0  0  0  0
    1.1116    0.7467    1.2468 C   0  0  0  0  0  0  0  0  0  0  0  0
    2.3033    0.0860    1.5061 C   0  0  0  0  0  0  0  0  0  0  0  0
    3.4035    0.8005    1.9744 C   0  0  0  0  0  0  0  0  0  0  0  0
    3.3183    2.1686    2.1843 C   0  0  0  0  0  0  0  0  0  0  0  0
    2.1336    2.8473    1.9308 C   0  0  0  0  0  0  0  0  0  0  0  0
   -0.2482    2.8301    1.1897 C   0  0  0  0  0  0  0  0  0  0  0  0
   -1.2891    2.1263    0.3472 C   0  0  0  0  0  0  0  0  0  0  0  0
   -1.4242    0.6808    0.8457 C   0  0  0  0  0  0  0  0  0  0  0  0
   -0.0679    0.0142    0.7483 C   0  0  0  0  0  0  0  0  0  0  0  0
   -0.8493    2.1255   -1.1183 C   0  0  0  0  0  0  0  0  0  0  0  0
   -0.5763    3.5398   -1.5616 C   0  0  0  0  0  0  0  0  0  0  0  0
   -1.9125   -0.7322    2.8241 C   0  0  0  0  0  0  0  0  0  0  0  0
   -1.8988    0.6808    2.3003 C   0  0  0  0  0  0  0  0  0  0  0  0
    4.5684    0.1523    2.2277 O   0  0  0  0  0  0  0  0  0  0  0  0
    0.0442   -1.0973    0.2775 O   0  0  0  0  0  0  0  0  0  0  0  0
   -0.4575    3.9399    1.6329 O   0  0  0  0  0  0  0  0  0  0  0  0
    2.0565    4.1850    2.1377 O   0  0  0  0  0  0  0  0  0  0  0  0
   -2.8726    2.9732    0.5087 Cl  0  0  0  0  0  0  0  0  0  0  0  0
   -2.3632   -0.0228    0.0300 O   0  0  0  0  0  0  0  0  0  0  0  0
    0.5851    3.8505   -2.0817 C   0  0  0  0  0  0  0  0  0  0  0  0
    1.6483    2.7937   -2.2367 C   0  0  0  0  0  0  0  0  0  0  0  0
   -1.1607   -2.4623    4.3742 C   0  0  0  0  0  0  0  0  0  0  0  0
   -1.2762   -1.0267    3.9307 C   0  0  0  0  0  0  0  0  0  0  0  0
    0.2843   -4.4770    4.3298 C   0  0  0  0  0  0  0  0  0  0  0  0
    0.1688   -3.0414    3.8863 C   0  0  0  0  0  0  0  0  0  0  0  0
    0.2518   -5.1117    1.9724 C   0  0  0  0  0  0  0  0  0  0  0  0
    0.3895   -5.4314    3.4386 C   0  0  0  0  0  0  0  0  0  0  0  0
    0.6482   -6.8490    3.8797 C   0  0  0  0  0  0  0  0  0  0  0  0
   -0.6597    0.0701    4.7601 C   0  0  0  0  0  0  0  0  0  0  0  0
    0.8581    5.2647   -2.5250 C   0  0  0  0  0  0  0  0  0  0  0  0
  1  2  2  0      
  2  3  1  0      
  3  4  2  0      
  4  5  1  0      
  5  6  2  0      
  6  1  1  0      
  1  7  1  0      
  7  8  1  0      
  8  9  1  0      
  9 10  1  0      
 10  2  1  0      
  8 11  1  0      
 11 12  1  0      
 13 14  1  0      
 14  9  1  0      
  4 15  1  0      
 10 16  2  0      
  7 17  2  0      
  6 18  1  0      
  8 19  1  0      
  9 20  1  0      
 12 21  2  0      
 21 22  1  0      
 23 24  1  0      
 24 13  2  0      
 25 26  1  0      
 26 23  1  0      
 27 28  1  0      
 28 25  2  0      
 28 29  1  0      
 24 30  1  0      
 21 31  1  0      
M  END
$$$$
