# Supplementary material for: Antibacterial and Cytotoxic New Napyradiomycins from the Marine-Derived Streptomyces sp. SCSIO 10428
Source: MDPI journal article supplement (doi:10.3390/md11062113), 2013-06-14
Supplement: s11 [file s11]

marinedrugs-11-02113-s005.mol
  ChemDraw02071408432D

 31 32  0  0  0  0  0  0  0  0999 V2000
    2.5006    0.4125    0.0000 C   0  0  0  0  0  0  0  0  0  0  0  0
    2.5006   -0.4125    0.0000 C   0  0  0  0  0  0  0  0  0  0  0  0
    3.2151   -0.8250    0.0000 C   0  0  0  0  0  0  0  0  0  0  0  0
    3.9296   -0.4125    0.0000 C   0  0  0  0  0  0  0  0  0  0  0  0
    3.9296    0.4125    0.0000 C   0  0  0  0  0  0  0  0  0  0  0  0
    3.2151    0.8250    0.0000 C   0  0  0  0  0  0  0  0  0  0  0  0
    1.7862    0.8250    0.0000 C   0  0  0  0  0  0  0  0  0  0  0  0
    1.0717    0.4125    0.0000 C   0  0  0  0  0  0  0  0  0  0  0  0
    1.0717   -0.4125    0.0000 C   0  0  0  0  0  0  0  0  0  0  0  0
    1.7862   -0.8250    0.0000 C   0  0  0  0  0  0  0  0  0  0  0  0
    0.3572    0.8250    0.0000 C   0  0  0  0  0  0  0  0  0  0  0  0
   -0.3572    0.4125    0.0000 C   0  0  0  0  0  0  0  0  0  0  0  0
   -0.3572   -0.4125    0.0000 C   0  0  0  0  0  0  0  0  0  0  0  0
    0.3572   -0.8250    0.0000 C   0  0  0  0  0  0  0  0  0  0  0  0
    4.6441   -0.8250    0.0000 O   0  0  0  0  0  0  0  0  0  0  0  0
    1.7862   -1.6500    0.0000 O   0  0  0  0  0  0  0  0  0  0  0  0
    1.7862    1.6500    0.0000 O   0  0  0  0  0  0  0  0  0  0  0  0
    3.2151    1.6500    0.0000 O   0  0  0  0  0  0  0  0  0  0  0  0
    1.0717    1.2375    0.0000 Cl  0  0  0  0  0  0  0  0  0  0  0  0
    1.0717   -1.2375    0.0000 O   0  0  0  0  0  0  0  0  0  0  0  0
   -1.0717    0.8250    0.0000 C   0  0  0  0  0  0  0  0  0  0  0  0
   -1.7862    0.4125    0.0000 C   0  0  0  0  0  0  0  0  0  0  0  0
   -1.7862   -0.4125    0.0000 C   0  0  0  0  0  0  0  0  0  0  0  0
   -1.0717   -0.8250    0.0000 C   0  0  0  0  0  0  0  0  0  0  0  0
   -3.2151   -0.4125    0.0000 C   0  0  0  0  0  0  0  0  0  0  0  0
   -2.5006   -0.8250    0.0000 C   0  0  0  0  0  0  0  0  0  0  0  0
   -4.6441   -0.4125    0.0000 C   0  0  0  0  0  0  0  0  0  0  0  0
   -3.9296   -0.8250    0.0000 C   0  0  0  0  0  0  0  0  0  0  0  0
   -3.9296   -1.6500    0.0000 C   0  0  0  0  0  0  0  0  0  0  0  0
   -1.0717   -1.6500    0.0000 C   0  0  0  0  0  0  0  0  0  0  0  0
   -1.0717    1.6500    0.0000 C   0  0  0  0  0  0  0  0  0  0  0  0
  1  2  2  0      
  2  3  1  0      
  3  4  2  0      
  4  5  1  0      
  5  6  2  0      
  6  1  1  0      
  1  7  1  0      
  7  8  1  0      
  8  9  1  0      
  9 10  1  0      
 10  2  1  0      
  8 11  1  0      
 11 12  1  0      
 13 14  1  0      
 14  9  1  0      
  4 15  1  0      
 10 16  2  0      
  7 17  2  0      
  6 18  1  0      
  8 19  1  1      
  9 20  1  6      
 12 21  2  0      
 21 22  1  0      
 23 24  1  0      
 24 13  2  0      
 25 26  1  0      
 26 23  1  0      
 27 28  1  0      
 28 25  2  0      
 28 29  1  0      
 24 30  1  0      
 21 31  1  0      
M  END
