# Supplementary material for: Antibacterial and Cytotoxic New Napyradiomycins from the Marine-Derived Streptomyces sp. SCSIO 10428
Source: MDPI journal article supplement (doi:10.3390/md11062113), 2013-06-14
Supplement: s12 [file s12]

marinedrugs-11-02113-s006.mol
  ChemDraw02071408432D

 32 36  0  0  0  0  0  0  0  0999 V2000
   -0.0148    0.9487    0.0000 C   0  0  0  0  0  0  0  0  0  0  0  0
   -0.0148    0.1238    0.0000 C   0  0  0  0  0  0  0  0  0  0  0  0
    0.6996   -0.2888    0.0000 C   0  0  0  0  0  0  0  0  0  0  0  0
    1.4141    0.1238    0.0000 C   0  0  0  0  0  0  0  0  0  0  0  0
    1.4141    0.9487    0.0000 C   0  0  0  0  0  0  0  0  0  0  0  0
    0.6996    1.3613    0.0000 C   0  0  0  0  0  0  0  0  0  0  0  0
   -0.7293    1.3613    0.0000 C   0  0  0  0  0  0  0  0  0  0  0  0
   -1.4438    0.9487    0.0000 C   0  0  0  0  0  0  0  0  0  0  0  0
   -1.4438    0.1238    0.0000 C   0  0  0  0  0  0  0  0  0  0  0  0
   -0.7293   -0.2888    0.0000 C   0  0  0  0  0  0  0  0  0  0  0  0
   -2.1583    1.3613    0.0000 C   0  0  0  0  0  0  0  0  0  0  0  0
   -2.8727    0.9487    0.0000 C   0  0  0  0  0  0  0  0  0  0  0  0
   -2.8727    0.1238    0.0000 C   0  0  0  0  0  0  0  0  0  0  0  0
   -2.1583   -0.2888    0.0000 O   0  0  0  0  0  0  0  0  0  0  0  0
   -0.7293   -1.1138    0.0000 O   0  0  0  0  0  0  0  0  0  0  0  0
   -0.7293    2.1862    0.0000 O   0  0  0  0  0  0  0  0  0  0  0  0
    0.6996    2.1862    0.0000 O   0  0  0  0  0  0  0  0  0  0  0  0
   -1.4438    1.7737    0.0000 Cl  0  0  0  0  0  0  0  0  0  0  0  0
    2.1286   -0.2888    0.0000 O   0  0  0  0  0  0  0  0  0  0  0  0
    2.8430    0.1238    0.0000 C   0  0  0  0  0  0  0  0  0  0  0  0
    2.8430    0.9487    0.0000 C   0  0  0  0  0  0  0  0  0  0  0  0
    2.1286    1.3613    0.0000 C   0  0  0  0  0  0  0  0  0  0  0  0
   -3.6696    0.3373    0.0000 C   0  0  0  0  0  0  0  0  0  0  0  0
   -3.2852   -0.5907    0.0000 C   0  0  0  0  0  0  0  0  0  0  0  0
   -3.5872    1.3613    0.0000 Cl  0  0  0  0  0  0  0  0  0  0  0  0
    3.6680    0.9487    0.0000 C   0  0  0  0  0  0  0  0  0  0  0  0
    3.6696   -1.2375    0.0000 C   0  0  0  0  0  0  0  0  0  0  0  0
    2.3496   -2.1656    0.0000 C   0  0  0  0  0  0  0  0  0  0  0  0
    1.1534   -1.4438    0.0000 C   0  0  0  0  0  0  0  0  0  0  0  0
   -0.2079   -2.1862    0.0000 C   0  0  0  0  0  0  0  0  0  0  0  0
   -1.4454   -1.5056    0.0000 C   0  0  0  0  0  0  0  0  0  0  0  0
    1.1534   -0.6188    0.0000 C   0  0  0  0  0  0  0  0  0  0  0  0
  1  2  2  0      
  2  3  1  0      
  3  4  2  0      
  4  5  1  0      
  5  6  2  0      
  6  1  1  0      
  1  7  1  0      
  7  8  1  0      
  8  9  1  0      
  9 10  1  0      
 10  2  1  0      
  8 11  1  0      
 11 12  1  0      
 13 14  1  0      
 14  9  1  0      
 10 15  2  0      
  7 16  2  0      
  6 17  1  0      
  8 18  1  1      
  4 19  1  0      
 19 20  1  0      
 20 21  1  0      
 21 22  1  0      
 22  5  1  0      
 12 13  1  0      
 13 23  1  0      
 13 24  1  0      
 12 25  1  6      
 21 26  2  0      
 27 28  1  0      
 28 29  1  0      
 26 27  1  0      
 29 30  2  0      
 30 31  1  0      
  9 31  1  1      
 29 32  1  0      
M  END
